# Supplementary material for: A systematic review reveals conflicting evidence for the prevalence of antibodies against the sialic acid ‘xenoautoantigen’ Neu5Gc in humans and the need for a standardised approach to quantification
Source: Frontiers journal article supplement (doi:10.3389/fmolb.2024.1390711), 2024-04-26
Supplement: Data_Sheet_1.pdf [file Data_Sheet_1.pdf]

## Supplementary Material

### 1- PRISMA checklist

| Section and Topic       | Item # | Checklist item                                                                                                                                                                                                                                                                                        | Reported (Yes/No) |
|-------------------------|--------|-------------------------------------------------------------------------------------------------------------------------------------------------------------------------------------------------------------------------------------------------------------------------------------------------------|-------------------|
| <b>TITLE</b>            |        |                                                                                                                                                                                                                                                                                                       |                   |
| Title                   | 1      | Identify the report as a systematic review.                                                                                                                                                                                                                                                           | Yes               |
| <b>BACKGROUND</b>       |        |                                                                                                                                                                                                                                                                                                       |                   |
| Objectives              | 2      | Provide an explicit statement of the main objective(s) or question(s) the review addresses.                                                                                                                                                                                                           | Yes               |
| <b>METHODS</b>          |        |                                                                                                                                                                                                                                                                                                       |                   |
| Eligibility criteria    | 3      | Specify the inclusion and exclusion criteria for the review.                                                                                                                                                                                                                                          | Yes               |
| Information sources     | 4      | Specify the information sources (e.g. databases, registers) used to identify studies and the date when each was last searched.                                                                                                                                                                        | Yes               |
| Risk of bias            | 5      | Specify the methods used to assess risk of bias in the included studies.                                                                                                                                                                                                                              | N/A               |
| Synthesis of results    | 6      | Specify the methods used to present and synthesise results.                                                                                                                                                                                                                                           | Yes               |
| <b>RESULTS</b>          |        |                                                                                                                                                                                                                                                                                                       |                   |
| Included studies        | 7      | Give the total number of included studies and participants and summarise relevant characteristics of studies.                                                                                                                                                                                         | Yes               |
| Synthesis of results    | 8      | Present results for main outcomes, preferably indicating the number of included studies and participants for each. If meta-analysis was done, report the summary estimate and confidence/credible interval. If comparing groups, indicate the direction of the effect (i.e. which group is favoured). | Yes               |
| <b>DISCUSSION</b>       |        |                                                                                                                                                                                                                                                                                                       |                   |
| Limitations of evidence | 9      | Provide a brief summary of the limitations of the evidence included in the review (e.g. study risk of bias, inconsistency and imprecision).                                                                                                                                                           | No                |
| Interpretation          | 10     | Provide a general interpretation of the results and important implications.                                                                                                                                                                                                                           | Yes               |
| <b>OTHER</b>            |        |                                                                                                                                                                                                                                                                                                       |                   |
| Funding                 | 11     | Specify the primary source of funding for the review.                                                                                                                                                                                                                                                 | Yes               |
| Registration            | 12     | Provide the register name and registration number.                                                                                                                                                                                                                                                    | N/A               |

| Section and Topic             | Item # | Checklist item                                                                                                                                                                                                                                                                                       | Location where item is reported |
|-------------------------------|--------|------------------------------------------------------------------------------------------------------------------------------------------------------------------------------------------------------------------------------------------------------------------------------------------------------|---------------------------------|
| <b>TITLE</b>                  |        |                                                                                                                                                                                                                                                                                                      |                                 |
| Title                         | 1      | Identify the report as a systematic review.                                                                                                                                                                                                                                                          | Title                           |
| <b>ABSTRACT</b>               |        |                                                                                                                                                                                                                                                                                                      |                                 |
| Abstract                      | 2      | See the PRISMA 2020 for Abstracts checklist.                                                                                                                                                                                                                                                         | See Abstract checklist          |
| <b>INTRODUCTION</b>           |        |                                                                                                                                                                                                                                                                                                      |                                 |
| Rationale                     | 3      | Describe the rationale for the review in the context of existing knowledge.                                                                                                                                                                                                                          | Introduction                    |
| Objectives                    | 4      | Provide an explicit statement of the objective(s) or question(s) the review addresses.                                                                                                                                                                                                               | Introduction                    |
| <b>METHODS</b>                |        |                                                                                                                                                                                                                                                                                                      |                                 |
| Eligibility criteria          | 5      | Specify the inclusion and exclusion criteria for the review and how studies were grouped for the syntheses.                                                                                                                                                                                          | Methods                         |
| Information sources           | 6      | Specify all databases, registers, websites, organisations, reference lists and other sources searched or consulted to identify studies. Specify the date when each source was last searched or consulted.                                                                                            | Table 1                         |
| Search strategy               | 7      | Present the full search strategies for all databases, registers and websites, including any filters and limits used.                                                                                                                                                                                 | Table 1                         |
| Selection process             | 8      | Specify the methods used to decide whether a study met the inclusion criteria of the review, including how many reviewers screened each record and each report retrieved, whether they worked independently, and if applicable, details of automation tools used in the process.                     | Methods                         |
| Data collection process       | 9      | Specify the methods used to collect data from reports, including how many reviewers collected data from each report, whether they worked independently, any processes for obtaining or confirming data from study investigators, and if applicable, details of automation tools used in the process. | Methods                         |
| Data items                    | 10a    | List and define all outcomes for which data were sought. Specify whether all results that were compatible with each outcome domain in each study were sought (e.g. for all measures, time points, analyses), and if not, the methods used to decide which results to collect.                        | Table 2                         |
|                               | 10b    | List and define all other variables for which data were sought (e.g. participant and intervention characteristics, funding sources). Describe any assumptions made about any missing or unclear information.                                                                                         | Table 2                         |
| Study risk of bias assessment | 11     | Specify the methods used to assess risk of bias in the included studies, including details of the tool(s) used, how many reviewers assessed each study and whether they worked independently, and if applicable, details of automation tools used in the process.                                    | N/A                             |
| Effect measures               | 12     | Specify for each outcome the effect measure(s) (e.g. risk ratio, mean difference) used in the synthesis or presentation of results.                                                                                                                                                                  | Methods                         |
| Synthesis methods             | 13a    | Describe the processes used to decide which studies were eligible for each synthesis (e.g. tabulating the study intervention characteristics and comparing against the planned groups for each synthesis (item #5)).                                                                                 | Figure 2                        |
|                               | 13b    | Describe any methods required to prepare the data for presentation or synthesis, such as handling of missing summary statistics, or data conversions.                                                                                                                                                | Methods                         |
|                               | 13c    | Describe any methods used to tabulate or visually display results of individual studies and syntheses.                                                                                                                                                                                               | Methods                         |

| Section and Topic             | Item # | Checklist item                                                                                                                                                                                                                                                                       | Location where item is reported |
|-------------------------------|--------|--------------------------------------------------------------------------------------------------------------------------------------------------------------------------------------------------------------------------------------------------------------------------------------|---------------------------------|
|                               | 13d    | Describe any methods used to synthesize results and provide a rationale for the choice(s). If meta-analysis was performed, describe the model(s), method(s) to identify the presence and extent of statistical heterogeneity, and software package(s) used.                          | Methods                         |
|                               | 13e    | Describe any methods used to explore possible causes of heterogeneity among study results (e.g. subgroup analysis, meta-regression).                                                                                                                                                 | Methods                         |
|                               | 13f    | Describe any sensitivity analyses conducted to assess robustness of the synthesized results.                                                                                                                                                                                         | N/A                             |
| Reporting bias assessment     | 14     | Describe any methods used to assess risk of bias due to missing results in a synthesis (arising from reporting biases).                                                                                                                                                              | N/A                             |
| Certainty assessment          | 15     | Describe any methods used to assess certainty (or confidence) in the body of evidence for an outcome.                                                                                                                                                                                | N/A                             |
| <b>RESULTS</b>                |        |                                                                                                                                                                                                                                                                                      |                                 |
| Study selection               | 16a    | Describe the results of the search and selection process, from the number of records identified in the search to the number of studies included in the review, ideally using a flow diagram.                                                                                         | Figure 2                        |
|                               | 16b    | Cite studies that might appear to meet the inclusion criteria, but which were excluded, and explain why they were excluded.                                                                                                                                                          | N/A                             |
| Study characteristics         | 17     | Cite each included study and present its characteristics.                                                                                                                                                                                                                            | Supplementary Materials         |
| Risk of bias in studies       | 18     | Present assessments of risk of bias for each included study.                                                                                                                                                                                                                         | N/A                             |
| Results of individual studies | 19     | For all outcomes, present, for each study: (a) summary statistics for each group (where appropriate) and (b) an effect estimate and its precision (e.g. confidence/credible interval), ideally using structured tables or plots.                                                     | Supplementary Materials         |
| Results of syntheses          | 20a    | For each synthesis, briefly summarise the characteristics and risk of bias among contributing studies.                                                                                                                                                                               | N/A                             |
|                               | 20b    | Present results of all statistical syntheses conducted. If meta-analysis was done, present for each the summary estimate and its precision (e.g. confidence/credible interval) and measures of statistical heterogeneity. If comparing groups, describe the direction of the effect. | Figures 3, 4, 5, 6 and 7        |
|                               | 20c    | Present results of all investigations of possible causes of heterogeneity among study results.                                                                                                                                                                                       | Results                         |
|                               | 20d    | Present results of all sensitivity analyses conducted to assess the robustness of the synthesized results.                                                                                                                                                                           | N/A                             |
| Reporting biases              | 21     | Present assessments of risk of bias due to missing results (arising from reporting biases) for each synthesis assessed.                                                                                                                                                              | N/A                             |
| Certainty of evidence         | 22     | Present assessments of certainty (or confidence) in the body of evidence for each outcome assessed.                                                                                                                                                                                  | N/A                             |
| <b>DISCUSSION</b>             |        |                                                                                                                                                                                                                                                                                      |                                 |
| Discussion                    | 23a    | Provide a general interpretation of the results in the context of other evidence.                                                                                                                                                                                                    | Conclusion                      |
|                               | 23b    | Discuss any limitations of the evidence included in the review.                                                                                                                                                                                                                      | Conclusion                      |
|                               | 23c    | Discuss any limitations of the review processes used.                                                                                                                                                                                                                                | Conclusion                      |
|                               | 23d    | Discuss implications of the results for practice, policy, and future research.                                                                                                                                                                                                       | Conclusion                      |

| Section and Topic                              | Item # | Checklist item                                                                                                                                                                                                                             | Location where item is reported                 |
|------------------------------------------------|--------|--------------------------------------------------------------------------------------------------------------------------------------------------------------------------------------------------------------------------------------------|-------------------------------------------------|
| <b>OTHER INFORMATION</b>                       |        |                                                                                                                                                                                                                                            |                                                 |
| Registration and protocol                      | 24a    | Provide registration information for the review, including register name and registration number, or state that the review was not registered.                                                                                             | Not registered                                  |
|                                                | 24b    | Indicate where the review protocol can be accessed, or state that a protocol was not prepared.                                                                                                                                             | Supplementary Materials                         |
|                                                | 24c    | Describe and explain any amendments to information provided at registration or in the protocol.                                                                                                                                            | N/A                                             |
| Support                                        | 25     | Describe sources of financial or non-financial support for the review, and the role of the funders or sponsors in the review.                                                                                                              | Acknowledgements                                |
| Competing interests                            | 26     | Declare any competing interests of review authors.                                                                                                                                                                                         | N/A                                             |
| Availability of data, code and other materials | 27     | Report which of the following are publicly available and where they can be found: template data collection forms; data extracted from included studies; data used for all analyses; analytic code; any other materials used in the review. | Data extracted found in Supplementary Materials |

From: Page MJ, McKenzie JE, Bossuyt PM, Boutron I, Hoffmann TC, Mulrow CD, et al. The PRISMA 2020 statement: an updated guideline for reporting systematic reviews. BMJ 2021;372:n71. doi: 10.1136/bmj.n71

For more information, visit: <http://www.prisma-statement.org/>

## 2- Data collected

| Information                                                                                                                                                                                                                                                                                                 | Year Published | Context | Context (detailed)                                                                                | Sample Number | Sample Preparation Method | Sample Demographic | Detection Method | Epitope production | Target Epitope | Control Epitope | Appropriate controls used? | Blocking Agent Used | % anti-Neu5Gc positive samples | Antibody Class Reported | IgG                  | IgA        | IgM        | Adjusted Variation (SD) | Adjusted Variation (Range) |
|-------------------------------------------------------------------------------------------------------------------------------------------------------------------------------------------------------------------------------------------------------------------------------------------------------------|----------------|---------|---------------------------------------------------------------------------------------------------|---------------|---------------------------|--------------------|------------------|--------------------|----------------|-----------------|----------------------------|---------------------|--------------------------------|-------------------------|----------------------|------------|------------|-------------------------|----------------------------|
| Akimoto S, Tahara H, Yanagawa S, Ide K, Tanaka Y, Kobayashi T, Ohdan H. Heterophile carbohydrate antigen N-glycolylneuraminic acid as a potential biomarker in patients with hepatocellular carcinoma. Cancer Rep (Hoboken). 2023;6(8):e1831.                                                               | 2023           | Cancer  | Neu5Gc antigen and antibodies as a hepatocellular carcinoma biomarker                             | 100           | Serum                     | Asia               | ELISA            | Synthetic          | Neu5Gc-PAA     | Neu5Ac-PAA      | TRUE                       | OVA                 | 53                             | IgG                     | 0.06 (OD)            | NOT STATED | NOT STATED | 0.17                    | NOT STATED                 |
| Alfonso S, Valdés-Zayas A, Santiesteban ER, Flores YI, Areces F, Hernández M, et al. A Randomized, Multicenter, Placebo-Controlled Clinical Trial of Racotumomab-Alum Vaccine as Switch Maintenance Therapy in Advanced Non-Small Cell Lung Cancer Patients. CLINICAL CANCER RESEARCH. 2014;20(14):3660-71. | 2014           | Cancer  | NSCLC patients immunized with a vaccine to mount an immune response against Neu5Gc-containing GM3 | 24            | Serum                     | North America      | ELISA            | Natural            | Neu5Gc-GM3     | Uncoated wells  | FALSE                      | BSA                 | 95.8                           | IgG, IgM                | 1 in 6400 (dilution) | NOT STATED | NOT STATED | NOT STATED              | NOT STATED                 |

|                                                                                                                                                                                                                                                            |      |                 |                                                                                                |     |          |               |              |           |                           |                           |       |            |            |     |            |            |            |            |            |
|------------------------------------------------------------------------------------------------------------------------------------------------------------------------------------------------------------------------------------------------------------|------|-----------------|------------------------------------------------------------------------------------------------|-----|----------|---------------|--------------|-----------|---------------------------|---------------------------|-------|------------|------------|-----|------------|------------|------------|------------|------------|
| Amon R, Ben-Arye SL, Engler L, Yu H, Lim N, Berre LL, et al. Glycan microarray reveal induced IgGs repertoire shift against a dietary carbohydrate in response to rabbit anti-human thymocyte therapy. <i>Oncotarget</i> . 2017;8(68):11223-44.            | 2017 | Biotherapeutics | Diabetes patients treated with anti-thrombocyte thymoglobulin                                  | 7   | Serum    | North America | Glycan Array | Synthetic | Matched Sialoglycan Pairs | Matched sialoglycan pairs | TRUE  | OVA        | 100        | IgG | 30.8 ug/mL | NOT STATED | NOT STATED | 0.44       | NOT STATED |
| Angeletti A, Bruschi M, Kajana X, Lugani F, Candiano G, Ghiggeri GM. Anti-Neu5Gc Antibodies do not Affect Response to Human or Chimeric Monoclonal Anti-CD20 Antibodies in Children with Nephrotic Syndrome. <i>J Am Soc Nephrol</i> . 2022;33(11):1985-7. | 2022 | Inflammation    | Anti-Neu5Gc in children with Nephrotic syndrome as pre-screening for a trial of anti-CD20 mAbs | 101 | Serum    | Europe        | ELISA        | Natural   | Bovine Sialomucin         | NOT STATED                | FALSE | OVA        | NOT STATED | IgG | 0.9 (OD)   | NOT STATED | NOT STATED | 0.211      | NOT STATED |
| Apostolovic D, Tran TA, Sánchez-Vidaurre S, Cirkovic Velickovic T, Starkhammar M, Hamsten C, van Hage M. Red meat allergic patients have a selective IgE response to the $\alpha$ -Gal glycan. <i>Allergy</i> . 2015;70(11):1497-500.                      | 2015 | Inflammation    | Anti-Neu5Gc IgE in patients with red meat allergies                                            | 24  | IgE only | Europe        | ImmunoCAP    | Synthetic | Neu5Gc-Biotin             | NOT STATED                | FALSE | NOT STATED | 0          | IgE | NOT STATED | NOT STATED | NOT STATED | NOT STATED | NOT STATED |

|                                                                                                                                                                                                           |      |                    |                                                                                             |    |       |             |              |           |                              |                                   |       |      |      |     |            |            |            |       |            |
|-----------------------------------------------------------------------------------------------------------------------------------------------------------------------------------------------------------|------|--------------------|---------------------------------------------------------------------------------------------|----|-------|-------------|--------------|-----------|------------------------------|-----------------------------------|-------|------|------|-----|------------|------------|------------|-------|------------|
| Arita K, Ikuta K, Nishi Y, Kato S, Yamauchi E, Maki S, naiki M. Heterophile Hanganutziu-Deicher antibodies in sera of patients with Kawasaki diseases. Biken J. 1982;25(4):157-62.                        | 1982 | Inflammation       | HD antibodies in patients with Kawasaki disease                                             | 39 | Serum | Asia        | ELISA        | Natural   | Neu5Gc-GM3                   | Uncoated wells                    | FALSE | NONE | 35.1 | IgG | 1.88 (RIA) | NOT STATED | NOT STATED | 0.55  | NOT STATED |
| Bashir S, Ben Arye SL, Reuven EM, Yu H, Costa C, Galiñanes M, et al. Presentation Mode of Glycans Affect Recognition of Human Serum anti-Neu5Gc IgG Antibodies. BIOCONJUGATE CHEMISTRY. 2019;30(1):161-8. | 2019 | Healthy Population | Testing variation in anti-Neu5Gc titres associated with different ways of presenting Neu5Gc | 5  | Serum | Middle East | ELISA        | Natural   | WT Mouse Sialoglyco proteins | CMAH KO mouse Sialoglyco proteins | TRUE  | OVA  | 100  | IgG | 0.69 (OD)  | NOT STATED | NOT STATED | 0.855 | NOT STATED |
| Bashir S, Ben Arye SL, Reuven EM, Yu H, Costa C, Galiñanes M, et al. Presentation Mode of Glycans Affect Recognition of Human Serum anti-Neu5Gc IgG Antibodies. BIOCONJUGATE CHEMISTRY. 2019;30(1):161-8. | 2019 | Healthy Population | Variation in anti-Neu5Gc titres associated with different ways of presenting Neu5Gc         | 11 | Serum | Middle East | Glycan Array | Synthetic | Matched Sialoglycan Pairs    | Matched sialoglycan pairs         | TRUE  | OVA  | 100  | IgG | 2379 (RFU) | NOT STATED | NOT STATED | 0.988 | NOT STATED |

|                                                                                                                                                                                                                                                                |      |                    |                                                                                              |     |                         |        |                |           |                              |                                   |      |      |            |          |             |            |            |            |            |
|----------------------------------------------------------------------------------------------------------------------------------------------------------------------------------------------------------------------------------------------------------------|------|--------------------|----------------------------------------------------------------------------------------------|-----|-------------------------|--------|----------------|-----------|------------------------------|-----------------------------------|------|------|------------|----------|-------------|------------|------------|------------|------------|
| Bashir S, Fezeu LK, Leviatan Ben-Arye S, Yehuda S, Reuven EM, Szabo de Edelenyi F, et al. Association between Neu5Gc carbohydrate and serum antibodies against it provides the molecular link to cancer: French NutriNet-Santé study. BMC Med. 2020;18(1):262. | 2020 | Healthy Population | Testing links between diet and anti-Neu5Gc antibodies using a large scale nutritional survey | 120 | Serum                   | Europe | ELISA          | Natural   | WT Mouse Sialoglyco proteins | CMAH KO mouse Sialoglyco proteins | TRUE | OVA  | 100        | IgG      | 4.4 (ug/mL) | NOT STATED | NOT STATED | 0.886      | NOT STATED |
| Bashir S, Fezeu LK, Leviatan Ben-Arye S, Yehuda S, Reuven EM, Szabo de Edelenyi F, et al. Association between Neu5Gc carbohydrate and serum antibodies against it provides the molecular link to cancer: French NutriNet-Santé study. BMC Med. 2020;18(1):262. | 2020 | Healthy Population | Testing links between diet and anti-Neu5Gc antibodies using a large scale nutritional survey | 120 | Serum                   | Europe | Glycan Array   | Synthetic | Matched Sialoglycan Pairs    | Matched sialoglycan pairs         | TRUE | OVA  | 100        | IgG      | NOT STATED  | NOT STATED | NOT STATED | NOT STATED | NOT STATED |
| Basnet NB, Ide K, Tahara H, Tanaka Y, Ohdan H. Deficiency of N-glycolylneuraminic acid and Gal $\alpha$ 1-3Gal $\beta$ 1-4GlcNAc epitopes in xenogeneic cells attenuates cytotoxicity of human natural antibodies. Xenotransplantation. 2010;17(6):440-8.      | 2010 | Healthy population | Assessing cytotoxicity of anti-Neu5Gc antibodies towards WT and CMAH KO mice                 | 7   | Serum, heat inactivated | Asia   | Flow Cytometry | Natural   | Mouse Thymocytes             | CMAH KO mouse thymocytes          | TRUE | NONE | NOT STATED | IgG, IgM | 25 (MFI)    | NOT STATED | 8 (MFI)    | NOT STATED | 0.88       |



|                                                                                                                                                                                                                                                                                |      |                     |                                                                                                     |        |                                |             |              |           |                           |                             |      |            |     |          |             |            |            |            |       |
|--------------------------------------------------------------------------------------------------------------------------------------------------------------------------------------------------------------------------------------------------------------------------------|------|---------------------|-----------------------------------------------------------------------------------------------------|--------|--------------------------------|-------------|--------------|-----------|---------------------------|-----------------------------|------|------------|-----|----------|-------------|------------|------------|------------|-------|
| Ben-Arye SL, Schneider C, Yu H, Bashir S, Chen X, von Gunten S, Padler-Karavani V. Differential Recognition of Diet-Derived Neu5Gc-Neoantigens on Glycan Microarrays by Carbohydrate-Specific Pooled Human IgG and IgA Antibodies. BIOCONJUGATE CHEMISTRY. 2019;30(5):1565-74. | 2019 | Healthy population  | Assessing capability of different microarray preparations to detect anti-Neu5Gc antibodies in serum | Pooled | IVIG, 7 different preparations | NA          | Glycan Array | Synthetic | Matched Sialoglycan Pairs | Matched sialoglycan pairs   | TRUE | OVA        | 100 | IgG, IgA | 950 (RFU)   | 1100 (RFU) | NOT STATED | NOT STATED | 10.78 |
| Ben-Arye SL, Yu H, Chen X, Padler-Karavani V. Profiling Anti-Neu5Gc IgG in Human Sera with a Sialoglycan Microarray Assay. JOVE-JOURNAL OF VISUALIZED EXPERIMENTS. 2017(125).                                                                                                  | 2017 | Healthy Population  | Protocol for using glycan arrays to assess anti-Neu5Gc antibodies in human serum                    | 12     | Serum                          | Middle East | Glycan Array | Synthetic | Matched Sialoglycan Pairs | Matched sialoglycan pairs   | TRUE | OVA        | 100 | IgG      | 2.1 (ug/mL) | NOT STATED | NOT STATED | NOT STATED | 18.05 |
| Blixt O, Kumagai-Braesch M, Tibell A, Groth CG, Holgersson J. Anticarbhydrate antibody repertoires in patients transplanted with fetal pig islets revealed by glycan arrays. American Journal of Transplantation. 2009;9(1):83-90.                                             | 2009 | Xenotransplantation | Anti-Neu5Gc antibody titres in type 1 Diabetes patients transplanted with porcine fetal islet cells | 7      | Serum, stored at -70C          | Europe      | Glycan Array | Synthetic | Neu5Gc-containing glycans | Neu5Ac-contains gly glycans | TRUE | NOT STATED | 28  | Total    | 15000 (RFU) | NOT STATED | NOT STATED | NOT STATED | 2.33  |

|                                                                                                                                                                                                                                                             |      |                     |                                                                                 |     |                         |               |                |           |             |                         |      |            |            |          |              |            |              |            |            |
|-------------------------------------------------------------------------------------------------------------------------------------------------------------------------------------------------------------------------------------------------------------|------|---------------------|---------------------------------------------------------------------------------|-----|-------------------------|---------------|----------------|-----------|-------------|-------------------------|------|------------|------------|----------|--------------|------------|--------------|------------|------------|
| Boligan KF, Oechtering J, Keller CW, Peschke B, Rieben R, Bovin N, et al. Xenogeneic Neu5Gc and self-glycan Neu5Ac epitopes are potential immune targets in MS. <i>Neurol Neuroimmunol Neuroinflamm.</i> 2020;7(2).                                         | 2020 | Inflammation        | Anti-Neu5Gc antibodies in patients with relapsing-remitting multiple sclerosis. | 25  | Serum, stored at -80C   | Europe        | Glycan Array   | Synthetic | a2-3 Neu5Gc | a2-3 Neu5Ac             | TRUE | BSA        | 96         | IgG      | 215 (RFU)    | NOT STATED | NOT STATED   | NOT STATED | 4.65       |
| Burlak C, Paris LL, Lutz AJ, Sidner RA, Estrada J, Li P, et al. Reduced binding of human antibodies to cells from GGTA1/CMAH KO pigs. <i>Am J Transplant.</i> 2014;14(8):1895-900.                                                                          | 2014 | Xenotransplantation | Binding of anti-Neu5Gc antibodies to GGTA1/CMAH KO pig cells                    | 121 | Serum, heat inactivated | North America | Flow Cytometry | Natural   | Pig PBMCs   | GGTA1/CMAH KO pig PBMCs | TRUE | NOT STATED | 96.6       | IgG, IgM | 1000 (MFI)   | NOT STATED | 1500 (MFI)   | NOT STATED | 4.1        |
| Butler JR, Martens GR, Estrada JL, Reyes LM, Ladowski JM, Galli C, et al. Silencing porcine genes significantly reduces human-anti-pig cytotoxicity profiles: an alternative to direct complement regulation. <i>TRANSGENIC RESEARCH.</i> 2016;25(5):751-9. | 2016 | Xenotransplantation | Binding of anti-Neu5Gc antibodies to GGTA1/CMAH/B4Ga INT2 KO pig cells          | 10  | Serum, heat inactivated | North America | Flow Cytometry | Natural   | Pig PBMCs   | CMAH KO PBMCs           | TRUE | NOT STATED | NOT STATED | IgG, IgM | 3917.1 (MFI) | NOT STATED | 5615.2 (MFI) | 0.27       | NOT STATED |

|                                                                                                                                                                                                                                                             |      |              |                                                                                                                               |            |                             |               |                    |         |                                |            |       |            |            |            |            |            |            |            |            |
|-------------------------------------------------------------------------------------------------------------------------------------------------------------------------------------------------------------------------------------------------------------|------|--------------|-------------------------------------------------------------------------------------------------------------------------------|------------|-----------------------------|---------------|--------------------|---------|--------------------------------|------------|-------|------------|------------|------------|------------|------------|------------|------------|------------|
| Caldwell KE, Cayer M, Whitney PL, Fletcher MA. Immunochemical studies of infectious mononucleosis-X. Characterization of a glycoprotein from horse erythrocytes which reacts with Paul-Bunnell antibody. Molecular Immunology. 1982;19(6):779-91.           | 1982 | Infection    | Binding of human antibodies to Neu5Gc-containing glycoproteins (isolated from horse erythrocytes) in infectious mononucleosis | NOT STATED | Serum, heterophile positive | North America | Radioimmunoassay   | Natural | Horse erythrocyte glycoprotein | NOT STATED | FALSE | Gelatin    | NOT STATED | NOT STATED | 5 (uM)     | NOT STATED | NOT STATED | NOT STATED | NOT STATED |
| Carmo M, Nobile-Orazio E, Chigorno V, Sonnino S. The anti-oligosaccharide antibodies present in sera from patients with motor neuron disease and neuropathy recognize the N-glycolylneuraminic acid containing ganglioside. Glycoconj J. 1995;12(5):729-31. | 1995 | Inflammation | Serum antibodies against both Neu5Gc-GM1 and Neu5Ac-GM1 in patients with motor neuron disease                                 | 2          | Serum                       | Europe        | TLC-immunostaining | Natural | Neu5Gc-GM1                     | Neu5Ac-GM1 | TRUE  | NOT STATED | 100        | IgM        | NOT STATED | NOT STATED | NOT STATED | NOT STATED | NOT STATED |

|                                                                                                                                                                                                                                               |      |                     |                                                                                                                                                          |     |                           |               |                |           |                              |                                                                                             |       |     |      |          |       |            |            |            |            |
|-----------------------------------------------------------------------------------------------------------------------------------------------------------------------------------------------------------------------------------------------|------|---------------------|----------------------------------------------------------------------------------------------------------------------------------------------------------|-----|---------------------------|---------------|----------------|-----------|------------------------------|---------------------------------------------------------------------------------------------|-------|-----|------|----------|-------|------------|------------|------------|------------|
| Chaban R, Habibabady Z, Hassanein W, Connolly MR, Burdorf L, Redding E, et al. Knock-out of N-glycolylneuraminic acid attenuates antibody-mediated rejection in xenogenically perfused porcine lungs. Xenotransplantation. 2022;29(6):e12784. | 2022 | Xenotransplantation | Binding of human serum antibodies to lung tissue from GalT/CMAH KO pigs. Measured titres pre- and post-incubation with porcine lung tissue               | 2   | Plasma, collected in EDTA | North America | Flow Cytometry | Natural   | porcine CMAH HEK cells       | WT HEK cells                                                                                | TRUE  | BSA | 100  | IgM, IgG | 66    | NOT STATED | 55         | 0.364      | NOT STATED |
| Chihara RK, Lutz AJ, Paris LL, Wang ZY, Sidner RA, Heyrman AT, et al. Fibronectin from alpha 1,3-galactosyltransferase knockout pigs is a xenoantigen. J Surg Res. 2013;184(2):1123-33.                                                       | 2013 | Xenotransplantation | Antibody binding to cells from GTKO pigs, with a specific focus on Neu5Gc conjugates on fibronectin                                                      | 1   | Serum, heat inactivated   | NOT STATED    | ELISA          | Synthetic | Neu5Gc-PAA                   | Neu5Ac-PAA                                                                                  | TRUE  | HSA | 100  | IgG      | 0.008 | NOT STATED | NOT STATED | NOT STATED | NOT STATED |
| Couvrat-Desvergnès G, Salama A, Le Berre L, Evanno G, Viklicky O, Hrubá P, et al. Rabbit antithymocyte globulin-induced serum sickness disease and human kidney graft survival. J Clin Invest. 2015;125(12):4655-65.                          | 2015 | Biotherapeutics     | Anti-Neu5Gc antibodies induced by treatment of transplant patients with rabbit ATG as a hypothesised driver of serum sickness and kidney graft rejection | 889 | Serum                     | Europe        | ELISA          | Natural   | WT Mouse Sialoglyco proteins | WT Mouse sialoglyco proteins + pre-incubation with 1:4000 CMAH KO mouse sialoglyco proteins | FALSE | OVA | 73.1 | IgG      | 2.28  | NOT STATED | NOT STATED | 1.35       | NOT STATED |

|                                                                                                                                                                                                                                                                                       |      |                     |                                                                                                                                                    |    |                               |               |                                          |         |                                                                                       |                                                  |       |            |            |               |            |            |            |            |            |
|---------------------------------------------------------------------------------------------------------------------------------------------------------------------------------------------------------------------------------------------------------------------------------------|------|---------------------|----------------------------------------------------------------------------------------------------------------------------------------------------|----|-------------------------------|---------------|------------------------------------------|---------|---------------------------------------------------------------------------------------|--------------------------------------------------|-------|------------|------------|---------------|------------|------------|------------|------------|------------|
| Cross-najafi AA, Farag K, Isidan A, Li W, Zhang W, Lin Z, et al. Co-expression of HLA-E and HLA-G on genetically modified porcine endothelial cells attenuates human NK cell-mediated degranulation. Front Immunol. 2023;14:1217809.                                                  | 2023 | Xenotransplantation | Human NK cell responses and antibody production against porcine liver endothelial cells with KO of CMAH and 4 other 'xenoantigen-associated' genes | 20 | Serum, heat inactivated       | North America | Flow Cytometry                           | Natural | CMAH/GGTA1/B4GalINT2/SLA-Ia chain/B2-microglobulin KO Porcine liver endothelial cells | NOT STATED                                       | FALSE | NOT STATED | NOT STATED | IgG, IgM      | 3400 (MFI) | NOT STATED | 2600 (MFI) | 0.26       | NOT STATED |
| Díaz A, Alfonso M, Alonso R, Saurez G, Troche M, Catalá M, et al. Immune responses in breast cancer patients immunized with an anti-idiotypic antibody mimicking NeuGc-containing gangliosides. CLINICAL IMMUNOLOGY. 2003;107(2):80-9.                                                | 2003 | Cancer              | Anti-Neu5Gc-ganglioside antibodies following immunization of breast cancer patients with a monoclonal antibody Neu5Gc-GM3 mimetic (1E10)           | 10 | serum                         | North America | ELISA                                    | Natural | Neu5Gc-GM3                                                                            | Neu5Gc-GM3 + pre-incubation with 1E10            | FALSE | BSA        | 100        | IgG, IgM      | 1 in 1840  | NOT STATED | 1 in 5640  | NOT STATED | 3.26       |
| Diswall M, Angström J, Karlsson H, Phelps CJ, Ayares D, Teneberg S, Breimer ME. Structural characterization of alpha1,3-galactosyltransferase knockout pig heart and kidney glycolipids and their reactivity with human and baboon antibodies. Xenotransplantation. 2010;17(1):48-60. | 2010 | Xenotransplantation | Reactivity of human serum antibodies to GalT-KO pig heart and kidney tissue. Identification of Neu5Gc as a 'non-gal' xenoantigen                   | 21 | Serum, pooled, AB blood group | Europe        | Thin layer chromatography immunostaining | Natural | Glycolipid fractions from porcine tissue                                              | Glycolipid fractions from GALT KO porcine tissue | FALSE | NOT STATED | NOT STATED | IgG, IGM, IgA | NOT STATED | NOT STATED | NOT STATED | NOT STATED | NOT STATED |

|                                                                                                                                                                                                                     |      |                     |                                                                                      |            |                                                                                     |               |                |           |                |                                    |       |            |            |          |            |            |            |            |            |
|---------------------------------------------------------------------------------------------------------------------------------------------------------------------------------------------------------------------|------|---------------------|--------------------------------------------------------------------------------------|------------|-------------------------------------------------------------------------------------|---------------|----------------|-----------|----------------|------------------------------------|-------|------------|------------|----------|------------|------------|------------|------------|------------|
| Eckermann JM, Buhler LH, Zhu A, Dor FJMF, Awwad M, Cooper DKC. Initial investigation of the potential of modified porcine erythrocytes for transfusion in primates. Xenotransplantation. 2004;11(1):18-26.          | 2004 | Xenotransplantation | Binding of 'non-Gal' antibodies in human serum to galactosidase treated porcine RBCs | NOT STATED | Serum, heat inactivated                                                             | Europe        | Flow Cytometry | Natural   | porcine RBCs   | Galactosidase treated porcine RBCs | FALSE | BSA        | NOT STATED | IgM      | NOT STATED | NOT STATED | 11 (MFI)   | NOT STATED | NOT STATED |
| Eleftheriou P, Kynigopoulos S, Giovou A, Mazmanidi A, Yovos J, Skepastianos P, et al. Prevalence of anti-Neu5Gc antibodies in patients with hypothyroidism. Biomed Res Int. 2014;2014:963230.                       | 2014 | Inflammation        | Anti-Neu5Gc antibodies in patients with hypothyroidism                               | 48         | Serum. Collected via centrifugation at 2500xg after 30 min clotting. Stored at -20C | NOT STATED    | ELISA          | Synthetic | Neu5Gc monomer | Neu5Ac monomer                     | TRUE  | OVA        | 98         | IgG      | 14.8       | NOT STATED | NOT STATED | 1          | NOT STATED |
| Estrada JL, Martens G, Li P, Adams A, Newell KA, Ford ML, et al. Evaluation of human and non-human primate antibody binding to pig cells lacking GGTA1/CMAH/4GalNT2 genes. XENOTRANSPLANTATION. 2015;22(3):194-202. | 2015 | Xenotransplantation | Human serum antibody binding to GGTA1/CMAH/4GalNT2 KO porcine PBMCs                  | 82         | Serum, heat inactivated                                                             | North America | Flow Cytometry | Natural   | porcine PBMCs  | CMAH KO porcine PBMCs              | TRUE  | NOT STATED | NOT STATED | IgG, IgM | NOT STATED | NOT STATED | NOT STATED | NOT STATED | NOT STATED |

|                                                                                                                                                                                                                                                    |      |                     |                                                                                                           |            |                                                                                                      |        |                             |           |                            |                                    |      |            |            |          |                     |            |                     |            |            |
|----------------------------------------------------------------------------------------------------------------------------------------------------------------------------------------------------------------------------------------------------|------|---------------------|-----------------------------------------------------------------------------------------------------------|------------|------------------------------------------------------------------------------------------------------|--------|-----------------------------|-----------|----------------------------|------------------------------------|------|------------|------------|----------|---------------------|------------|---------------------|------------|------------|
| Feng H, Li T, Du J, Xia Q, Wang L, Chen S, et al. Both natural and induced Anti-Sda Antibodies Play Important Roles in GTKO Pig-to-Rhesus Monkey Xenotransplantation. Front Immunol. 2022;13:849711.                                               | 2022 | Xenotransplantation | Human serum antibody binding to CMAH KO porcine PBMCs                                                     | 20         | Serum, stored at -80, heat inactivated immediately before use                                        | Asia   | Flow Cytometry              | Natural   | porcine PBMCs              | CMAH KO porcine PBMCs              | TRUE | Goat Serum | 100        | IgG, IgM | 1000 (MFI)          | NOT STATED | 1700 (MFI)          | NOT STATED | 0.1        |
| Fischer K, Rieblinger B, Heinrich R, Sfriso R, Zuber J, Fischer A, et al. Viable pigs after simultaneous inactivation of porcine MHC class I and three xenoreactive antigen genes GGTA1, CMAH and B4GALNT2. Xenotransplantation. 2020;27(1):e12560 | 2020 | Xenotransplantation | Human serum antibody binding to CMAH KO porcine kidney cells                                              | NOT STATED | Serum, collected in 5-monovette tubes. 30 min clotting then centrifugation at 2000xg. Stored at -80C | Europe | Immunofluorescence staining | Natural   | porcine kidney fibroblasts | CMAH KO porcine kidney fibroblasts | TRUE | BSA        | 100        | IgG, IgM | 5200000 (int. den.) | NOT STATED | 3700000 (int. den.) | 0.538      | NOT STATED |
| Frei R, Ferstl R, Roduit C, Ziegler M, Schiavi E, Barcik W, et al. Exposure to nonmicrobial N-glycolylneuraminic acid protects farmers' children against airway inflammation and colitis. J Allergy Clin Immunol. 2018;141(1):382-90.e7.           | 2018 | Inflammation        | Anti-Neu5Gc antibodies in children from rural environments, with a focus on links to inflammatory disease | 299        | Serum                                                                                                | Europe | ELISA                       | Synthetic | Neu5Gc-PAA                 | Neu5Ac-PAA                         | TRUE | TBST       | NOT STATED | IgG      | 2                   | NOT STATED | NOT STATED          | 2.935      | NOT STATED |

|                                                                                                                                                                                                                         |      |                    |                                                                                                                                                                                                                                   |     |                                         |        |                |           |                               |                                       |       |            |            |               |                              |            |                  |            |            |
|-------------------------------------------------------------------------------------------------------------------------------------------------------------------------------------------------------------------------|------|--------------------|-----------------------------------------------------------------------------------------------------------------------------------------------------------------------------------------------------------------------------------|-----|-----------------------------------------|--------|----------------|-----------|-------------------------------|---------------------------------------|-------|------------|------------|---------------|------------------------------|------------|------------------|------------|------------|
| Frei R, Roduit C, Ferstl R, O'Mahony L, Lauener RP. Exposure of Children to Rural Lifestyle Factors Associated With Protection Against Allergies Induces an Anti-Neu5Gc Antibody Response. Front Immunol. 2019;10:1628. | 2019 | Inflammation       | Anti-Neu5Gc antibodies in children from rural environments, with a focus on links to allergic disease. Compared children with cows milk vs no milk consumption                                                                    | 734 | Serum                                   | Europe | ELISA          | Synthetic | Neu5Gc-PAA                    | Neu5Ac-PAA                            | TRUE  | TBST       | NOT STATED | IgG           | 5.57 (ratio to no cows milk) | NOT STATED | NOT STATED       | 3.056      | NOT STATED |
| Gao B, Long C, Lee W, Zhang Z, Gao X, Landsittel D, et al. Anti-Neu5Gc and anti-non-Neu5Gc antibodies in healthy humans. PLoS One. 2017;12(7):e0180768.                                                                 | 2017 | Healthy Population | Assessing whether anti-Neu5Gc antibodies are present in healthy human serum via ability to bind to WT and CMAH KO porcine RBCs and AECs                                                                                           | 84  | Serum, heat inactivated, stored at -80C | Global | Flow Cytometry | Natural   | porcine RBCs and porcine AECs | CMAH KO porcine RBCs and porcine AECs | TRUE  | Goat Serum | 50         | IgG, IgM      | 25 (relative GM)             | NOT STATED | 30 (relative GM) | NOT STATED | 6          |
| Gao B, Long C, Lee W, Zhang Z, Gao X, Landsittel D, et al. Anti-Neu5Gc and anti-non-Neu5Gc antibodies in healthy humans. PLoS One. 2017;12(7):e0180768.                                                                 | 2017 | Healthy Population | Assessing whether anti-Neu5Gc antibodies are present in healthy human serum via ability to bind to WT and CMAH KO porcine RBCs and AECs                                                                                           | 84  | Serum, heat inactivated, stored at -80C | Global | ELISA          | Synthetic | Neu5Gc-PAA                    | Neu5Ac-2-OCH2C6H4-p-NHCOCH2           | FALSE | BSA        | 71         | IgG, IgM      | 0.15                         | NOT STATED | 0.02             | NOT STATED | 5          |
| Gathuru JK, Higashi H, Kato S, Usuba O, naiki M. Use of biotinylated antibody for the assay of Hanganutziu-Deicher antibodies and antigens in fluids and tissues from cancer patients. Jpn J Vet Res. 1989;37(2):71-83. | 1989 | Cancer             | Attempt to improve ELISA assays to detect anti-Neu5Gc-GM3 (HD antibody) concentration in human samples. Inferred anti-Neu5Gc in human serum via the ability of sera to outcompete a biotinylated chicken anti-Neu5Gc-GM3 antibody | 3   | Serum                                   | Asia   | ELISA          | Natural   | Neu5Gc-GM3                    | Neu5Ac-GM3                            | TRUE  | OVA        | 66         | IgG, IgM, IgA | 50% inhibition               | NOT STATED | NOT STATED       | 0.2        | NOT STATED |



|                                                                                                                                                                                                                      |      |                     |                                                                                                                                             |            |                       |               |                |         |                    |                             |       |            |                   |          |            |            |                |            |            |
|----------------------------------------------------------------------------------------------------------------------------------------------------------------------------------------------------------------------|------|---------------------|---------------------------------------------------------------------------------------------------------------------------------------------|------------|-----------------------|---------------|----------------|---------|--------------------|-----------------------------|-------|------------|-------------------|----------|------------|------------|----------------|------------|------------|
| Ghaderi D, Taylor RE, Padler-Karavani V, Diaz S, Varki A. Implications of the presence of N-glycolylneuraminic acid in recombinant glycoproteins. nat Biotechnol. 2010;28(8):863-7.                                  | 2010 | Biotherapeutics     | Assessed binding of affinity-purified anti-Neu5Gc antibodies from human serum to Cetuximab and Panitumumab                                  | NOT STATED | Serum                 | North America | ELISA          | Natural | Cetuximab          | Sialidase-treated cetuximab | FALSE | TBST       | NOT STATED        | IgG      | 0.21 (OD)  | NOT STATED | NOT STATED     | 0.476      | NOT STATED |
| Golaszewska E, Kurowska E, Duk M, Kościelak J. Paul-Bunnell antigen and a possible mechanism of formation of heterophile antibodies in patients with infectious mononucleosis. Acta Biochim Pol. 2003;50(4):1205-11. | 2003 | Infection           | Neu5Gc-containing glycolipids as a component of the 'Paul-Bunnell' antigen used to test for Infectious Mononucleosis                        | 3          | Serum, pooled         | Europe        | ELISA          | Natural | Neu5Gc-GM3 (horse) | Neu5Ac-GM3 (dog)            | TRUE  | PBST       | NOT STATED        | IgM      | NOT STATED | NOT STATED | 75% inhibition | NOT STATED | NOT STATED |
| He S, Li T, Feng H, Du J, Cooper DKC, Hara H, et al. Incidence of serum antibodies to xenoantigens on triple-knockout pig cells in different human groups. Xenotransplantation. 2023:e12818.                         | 2023 | Xenotransplantation | Binding of human serum antibodies from healthy patients, renal disease patients and kidney transplant patients to PBMCs from triple KO pigs | 130        | Serum, stored at -80C | Asia          | Flow Cytometry | Natural | porcine PBMCs      | NOT STATED                  | FALSE | NOT STATED | 86 (IgM), 0 (IgG) | IgG, IgM | 1 (GM)     | NOT STATED | 2.1 (GM)       | NOT STATED | 4.1        |

|                                                                                                                                                                                                                                                                                           |      |        |                                                                                                                                                                                                  |    |       |               |                |         |                              |                             |       |            |    |          |                       |             |             |            |       |
|-------------------------------------------------------------------------------------------------------------------------------------------------------------------------------------------------------------------------------------------------------------------------------------------|------|--------|--------------------------------------------------------------------------------------------------------------------------------------------------------------------------------------------------|----|-------|---------------|----------------|---------|------------------------------|-----------------------------|-------|------------|----|----------|-----------------------|-------------|-------------|------------|-------|
| Hernández AM, Rodríguez N, González JE, Reyes E, Rondón T, Griñán T, et al. Anti-NeuGcGM3 Antibodies, Actively Elicited by Idiotypic Vaccination in Nonsmall Cell Lung Cancer Patients, Induce Tumor Cell Death by an Oncosis-Like Mechanism. JOURnaL OF IMMUNOLOGY. 2011;186(6):3735-44. | 2011 | Cancer | Attempts to elicit anti-Neu5Gc-GM3 antibodies in patients to target NSCLC cells. Measured pre- and post-immunized sera binding to Neu5Gc-GM3-expressing L1210 murine lymphocytic leukaemia cells | 4  | Serum | North America | Flow Cytometry | Natural | L1210 cells                  | NOT STATED                  | FALSE | BSA        | 66 | IgG      | 58.68% (avg . shift ) | NO T STATED | NO T STATED | NOT STATED | 0.9   |
| Hernández AM, Toledo D, Martínez D, Griñán T, Brito V, Macías A, et al. Characterization of the Antibody Response against NeuGcGM3 Ganglioside Elicited in Non-Small Cell Lung Cancer Patients Immunized with an Anti-Idiotypic Antibody. JOURnaL OF IMMUNOLOGY. 2008;181(9):6625-34.     | 2008 | Cancer | Attempts to elicit anti-Neu5Gc-GM3 antibodies in patients to target NSCLC cells. Measured pre- and post-immunized sera binding to Neu5Gc-GM3-expressing X63 murine myeloma cells                 | 20 | Serum | North America | Flow Cytometry | Natural | X63 murine lung cancer cells | H82 human lung cancer cells | FALSE | NOT STATED | 83 | IgG, IgM | 45.5% (avg . shift )  | NO T STATED | NO T STATED | NOT STATED | 0.627 |

|                                                                                                                                                                                                                                                                                       |      |                     |                                                                                                                                                                                  |     |                                                                               |               |                |           |                 |                |       |                                            |                    |          |                |            |                |            |            |
|---------------------------------------------------------------------------------------------------------------------------------------------------------------------------------------------------------------------------------------------------------------------------------------|------|---------------------|----------------------------------------------------------------------------------------------------------------------------------------------------------------------------------|-----|-------------------------------------------------------------------------------|---------------|----------------|-----------|-----------------|----------------|-------|--------------------------------------------|--------------------|----------|----------------|------------|----------------|------------|------------|
| Hernández AM, Toledo D, Martínez D, Griñán T, Brito V, Macías A, et al. Characterization of the Antibody Response against NeuGcGM3 Ganglioside Elicited in Non-Small Cell Lung Cancer Patients Immunized with an Anti-Idiotypic Antibody. JOURnaL OF IMMUNOLOGY. 2008;181(9):6625-34. | 2008 | Cancer              | Attempts to elicit anti-Neu5Gc-GM3 antibodies in patients to target NSCLC cells. Measured pre- and post-immunized sera binding to Neu5Gc-GM3-expressing X63 murine myeloma cells | 20  | Serum                                                                         | North America | ELISA          | Natural   | Neu5Gc-GM3      | Uncoated wells | FALSE | BSA                                        | 80                 | IgG, IgM | 2.9 (OD)       | NOT STATED | NOT STATED     | NOT STATED | 0.24       |
| Hurh S, Kang B, Choi I, Cho B, Lee EM, Kim H, et al. Human antibody reactivity against xenogeneic N-glycolylneuraminic acid and galactose- $\alpha$ -1,3-galactose antigen. Xenotransplantation. 2016;23(4):279-92.                                                                   | 2016 | Xenotransplantation | Human serum antibody binding and CDC against CMAH-transfected HEK cells to investigate role in graft rejection                                                                   | 100 | Serum, collected in BD Vacutainer SST tubes, stored at -80C, heat inactivated | Asia          | Flow Cytometry | Natural   | pCMAH HEK cells | WT HEK cells   | TRUE  | Neu5Gc assay blocking solution (BioLegend) | 4 (IgM), 62 (IgG)  | IgG, IgM | 4.88 (log MFI) | NOT STATED | 3.55 (log MFI) | 0.299      | NOT STATED |
| Hurh S, Kang B, Choi I, Cho B, Lee EM, Kim H, et al. Human antibody reactivity against xenogeneic N-glycolylneuraminic acid and galactose- $\alpha$ -1,3-galactose antigen. Xenotransplantation. 2016;23(4):279-92.                                                                   | 2016 | Xenotransplantation | Human serum antibody binding and CDC against CMAH-transfected HEK cells to investigate role in graft rejection                                                                   | 20  | Serum, collected in BD Vacutainer SST tubes, stored at -80C, heat inactivated | Asia          | ELISA          | Synthetic | Neu5Gc-PAA      | PAA only       | FALSE | TBST                                       | 40 (IgM), 85 (IgG) | IgG, IgM | 0.09 (OD)      | NOT STATED | 0.09 (OD)      | 0.556      | NOT STATED |

|                                                                                                                                                                                                          |      |                     |                                                                                                                                                              |         |                         |               |                |         |                            |                          |       |            |            |          |             |            |              |       |            |
|----------------------------------------------------------------------------------------------------------------------------------------------------------------------------------------------------------|------|---------------------|--------------------------------------------------------------------------------------------------------------------------------------------------------------|---------|-------------------------|---------------|----------------|---------|----------------------------|--------------------------|-------|------------|------------|----------|-------------|------------|--------------|-------|------------|
| Kanduma EG, Mukuria JC, Mwanda OW. Serum total sialic acid and Hanganutziu-Deicher antibody in normals and in cancer patients. East Afr Med J. 2007;84(5):207-14.                                        | 2007 | Cancer              | Level of 'HD antibody' in patients with various cancers                                                                                                      | 420     | Serum, stored at -20C   | Africa        | ELISA          | Natural | Horse erythrocyte membrane | sodium taurodeoxycholate | FALSE | OVA        | NOT STATED | IgG      | 0.014 (OD)  | NOT STATED | NOT STATED   | 3.57  | NOT STATED |
| Kim GA, Lee EM, Jin JX, Lee S, Taweekhaipaisan kul A, Hwang JJ, et al. Generation of CMAHKO/GTKO/shTNFRI-Fc/HO-1 quadruple gene modified pigs. Transgenic Res. 2017;26(4):435-45.                        | 2017 | Xenotransplantation | Binding of human serum antibodies to CMAH/GT/shTNFRI-Fc/Hhah-1 KO pig aortic endothelial cells                                                               | Pool ed | Serum, heat inactivated | North America | Flow Cytometry | Natural | porcine AECs               | GT/CMAH KO porcine AECs  | FALSE | NOT STATED | NOT STATED | IgG, IgM | 75.48 (MFI) | NOT STATED | 301.52 (MFI) | 1.57  | NOT STATED |
| Kobayashi T, Suzuki A, Yokoyama I, Abe M, Hayashi S, nagasaka T, et al., editors. Immunogenicity of Hanganutziu-Deicher antigens in pig-to-human xenotransplantation. Transplantation Proceedings; 2000. | 2000 | Xenotransplantation | Binding of human serum antibodies from patients treated with ex vivo pig kidney perfusion or fetal porcine islet transplant to 'HD-antigens' on porcine AECs | 32      | Serum                   | Asia          | ELISA          | Natural | Neu5Gc-GM3                 | Uncoated wells           | FALSE | OVA        | NOT STATED | IgG, IgM | 0.099 (OD)  | NOT STATED | 0.054 (OD)   | 0.869 | NOT STATED |

|                                                                                                                                                                                                                                                                |      |                     |                                                                                                                                                                                                      |         |                                                    |            |                |         |                                 |                                                            |       |     |                        |          |            |            |            |            |            |
|----------------------------------------------------------------------------------------------------------------------------------------------------------------------------------------------------------------------------------------------------------------|------|---------------------|------------------------------------------------------------------------------------------------------------------------------------------------------------------------------------------------------|---------|----------------------------------------------------|------------|----------------|---------|---------------------------------|------------------------------------------------------------|-------|-----|------------------------|----------|------------|------------|------------|------------|------------|
| Kobayashi T, Yokoyama I, Suzuki A, Abe M, Hayashi S, Matsuda H, et al. Lack of antibody production against Hanganutziu-Deicher (H-D) antigens with N-glycolylneuraminic acid in patients with porcine exposure history. Xenotransplantation. 2000;7(3):177-80. | 2000 | Xenotransplantation | Antibodies against HD antigens in humans exposed to porcine tissues for therapeutic purposes                                                                                                         | 12      | Serum                                              | Europe     | ELISA          | Natural | Neu5Gc-GM3                      | Uncoated wells                                             | FALSE | OVA | 0                      | IgG, IgM | 0.099 (OD) | NOT STATED | 0.054 (OD) | 0.869      | NOT STATED |
| Koda T, Aosasa M, Asaoka H, Nakaba H, Matsuda H. Application of tyramide signal amplification for detection of N-glycolylneuraminic acid in human hepatocellular carcinoma. Int J Clin Oncol. 2003;8(5):317-21.                                                | 2003 | Cancer              | Assessing a tyramide signal amplification method for detecting low-level Neu5Gc in hepatocellular carcinoma tissue samples. Assessed anti-Neu5Gc antibodies in HCC patient sera as an aside to this. | 17      | Serum, separated by centrifugation, stored at -30C | Asia       | ELISA          | Natural | Neu5Gc-GM3 (horse erythrocytes) | NOT STATED                                                 | FALSE | OVA | 64.7 (IgG), 52.9 (IgM) | IgG, IgM | 0.63 (OD)  | NOT STATED | 0.191 (OD) | 0.254      | NOT STATED |
| Komoda H, Miyagawa S, Kubo T, Kitano E, Kitamura H, Omori T, et al. A study of the xenoreactivity of adult pig islets cells. XENOTRANSPLANTATION. 2004;11(3):237-46.                                                                                           | 2004 | Xenotransplantation | Assessed binding of 'non-Gal' antibodies in human serum to porcine islet cells. Used HD antigen expression on islet cells to infer anti-Neu5Gc as accounting for a proportion of non-gal antibodies  | Pool ed | Serum, pooled blood type O                         | NOT STATED | Flow Cytometry | Natural | Porcine islet cells             | PDMP (glycosylation inhibitor) treated porcine islet cells | FALSE | PBS | NOT STATED             | IgG, IgM | 3.05 (MFI) | NOT STATED | 0.21 (OD)  | NOT STATED | NOT STATED |

|                                                                                                                                                                                                                                                                  |      |                     |                                                                                                                                      |     |                                         |        |                |           |                              |                                                                                             |       |            |                        |          |             |            |             |            |            |
|------------------------------------------------------------------------------------------------------------------------------------------------------------------------------------------------------------------------------------------------------------------|------|---------------------|--------------------------------------------------------------------------------------------------------------------------------------|-----|-----------------------------------------|--------|----------------|-----------|------------------------------|---------------------------------------------------------------------------------------------|-------|------------|------------------------|----------|-------------|------------|-------------|------------|------------|
| Kumar G, Satyananda V, Fang J, Zhou H, Fujita M, Ekser B, et al. Is There a Correlation Between Anti-Pig Antibody Levels in Humans and Geographic Location During Childhood? TRANSPLANTATION. 2013;96(4):387-93.                                                 | 2014 | Xenotransplantation | Assessed anti-Neu5Gc as 'anti-non-Gal' antibodies. Donor serum from multiple geographic locations                                    | 75  | Serum, heat inactivated, stored at -80C | Global | Flow Cytometry | Natural   | WT porcine PBMCs             | GTKO porcine PBMCs                                                                          | FALSE | NOT STATED | NOT STATED             | IgG, IgM | 1.38 (rMFI) | NOT STATED | 1.60 (rMFI) | 0.11       | NOT STATED |
| Le Berre L, Rousse J, Gourraud PA, Imbert-Marcille BM, Salama A, Evanno G, et al. Decrease of blood anti-α1,3 Galactose Abs levels in multiple sclerosis (MS) and clinically isolated syndrome (CIS) patients. Clin Immunol. 2017;180:128-35.                    | 2017 | Inflammation        | Anti-Neu5Gc antibody titres in patients with MS (theorized due to a potential link between EBV infection and anti-Neu5Gc antibodies) | 193 | Serum                                   | Europe | ELISA          | Natural   | WT Mouse Sialoglyco proteins | WT Mouse sialoglyco proteins + pre-incubation with 1:4000 CMAH KO mouse sialoglyco proteins | FALSE | OVA        | 100                    | IgG      | 2.9         | NOT STATED | NOT STATED  | 0.172      | NOT STATED |
| Lee EJ, Lee H, Park EM, Kang HJ, Kim SJ, Park CG. Immunoglobulin M and Immunoglobulin G Subclass Distribution of Anti-galactose-Alpha-1,3-Galactose and Anti-N-Glycolylneuraminic Acid Antibodies in Healthy Korean Adults. Transplant Proc. 2021;53(5):1762-70. | 2021 | Healthy Population  | Anti-Neu5Gc antibody titres in healthy Korean adults                                                                                 | 380 | Serum                                   | Asia   | ELISA          | Synthetic | Neu5Gc-BSA                   | Uncoated wells                                                                              | FALSE | BSA        | 96.6 (IgG), 87.4 (IgM) | IgG, IgM | 0.194       | NOT STATED | 0.328       | NOT STATED | NOT STATED |

|                                                                                                                                                                                                                                                                                           |      |                     |                                                                           |         |                                 |               |                             |         |                                                      |                                                         |      |            |            |          |                      |            |                      |            |            |
|-------------------------------------------------------------------------------------------------------------------------------------------------------------------------------------------------------------------------------------------------------------------------------------------|------|---------------------|---------------------------------------------------------------------------|---------|---------------------------------|---------------|-----------------------------|---------|------------------------------------------------------|---------------------------------------------------------|------|------------|------------|----------|----------------------|------------|----------------------|------------|------------|
| Lee W, Hara H, Ezzelarab MB, Iwase H, Bottino R, Long C, et al. Initial in vitro studies on tissues and cells from GTKO/CD46/NeuGcKO pigs. Xenotransplantation. 2016;23(2):137-50.                                                                                                        | 2016 | Xenotransplantation | Human serum antibody binding to tissues from GGTA/CMAH KO pigs            | 6       | Serum, all blood groups         | North America | Flow Cytometry              | Natural | GGTA KO porcine aortic and corneal endothelial cells | GT/CMAH KO porcine aortic and corneal endothelial cells | TRUE | Goat Serum | NOT STATED | IgG, IgM | 2 (AEC, rMFI change) | NOT STATED | 3 (AEC, rMFI change) | 0.25       | NOT STATED |
| Lee W, Long C, Ramsoondar J, Ayares D, Cooper DK, Manji RA, Hara H. Human antibody recognition of xenogeneic antigens (NeuGc and Gal) on porcine heart valves: could genetically modified pig heart valves reduce structural valve deterioration? Xenotransplantation. 2016;23(5):370-80. | 2016 | Xenotransplantation | Human serum antibody binding to heart valve tissue from GTKO/CMAH KO pigs | Pool ed | Serum, pooled, heat inactivated | North America | Immunofluorescence staining | Natural | GTKO pig heart valves                                | GT/CMAH KO pig heart valves                             | TRUE | Goat Serum | NOT STATED | IgG, IgM | Decrease             | NOT STATED | Decrease             | NOT STATED | NOT STATED |
| Lee W, Miyagawa Y, Long C, Ekser B, Walters E, Ramsoondar J, et al. Expression of NeuGc on Pig Corneas and Its Potential Significance in Pig Corneal Xenotransplantation. Cornea. 2016;35(1):105-13.                                                                                      | 2016 | Xenotransplantation | Human serum antibody binding to corneal tissue from CMAH KO pigs          | Pool ed | Serum, pooled, heat inactivated | North America | Flow Cytometry              | Natural | GTKO pig corneal endothelial cells                   | GT/CMAH KO pig corneal endothelial cells                | TRUE | Goat Serum | 50         | IgG, IgM | 2 (MFI decrease)     | NOT STATED | 3 (MFI decrease)     | NOT STATED | NOT STATED |

|                                                                                                                                                                                                                                                                                |      |                     |                                                                                                           |        |                                |             |                |           |                                                    |                                |       |            |            |          |                      |            |                      |            |       |
|--------------------------------------------------------------------------------------------------------------------------------------------------------------------------------------------------------------------------------------------------------------------------------|------|---------------------|-----------------------------------------------------------------------------------------------------------|--------|--------------------------------|-------------|----------------|-----------|----------------------------------------------------|--------------------------------|-------|------------|------------|----------|----------------------|------------|----------------------|------------|-------|
| Leviatan Ben-Arye S, Schneider C, Yu H, Bashir S, Chen X, von Gunten S, Padler-Karavani V. Differential Recognition of Diet-Derived Neu5Gc-Neoantigens on Glycan Microarrays by Carbohydrate-Specific Pooled Human IgG and IgA Antibodies. Bioconjug Chem. 2019;30(5):1565-74. | 2019 | Healthy Population  | Pooled therapeutic IVIG binding to sialoglycan arrays                                                     | Pooled | IVIG, 5 different preparations | NOT STATED  | Glycan Array   | Synthetic | Matched Sialoglycan Pairs                          | Matched sialoglycan pairs      | TRUE  | OVA        | 100        | IgG, IgA | 1570 (RFU)           | 1100 (RFU) | NOT STATED           | NOT STATED | 1.33  |
| Leviatan Ben-Arye S, Yu H, Chen X, Padler-Karavani V. Profiling Anti-Neu5Gc IgG in Human Sera with a Sialoglycan Microarray Assay. J Vis Exp. 2017(125).                                                                                                                       | 2017 | Healthy Population  | Method for anti-Neu5Gc IgG detection using a sialoglycan microarray                                       | 12     | Serum                          | Middle East | Glycan Array   | Synthetic | Matched Sialoglycan Pairs                          | Matched sialoglycan pairs      | TRUE  | OVA        | 100        | IgG      | 2 ng/μL              | NOT STATED | NOT STATED           | NOT STATED | 19.3  |
| Li P, Walsh JR, Lopez K, Isidan A, Zhang W, Chen AM, et al. Genetic engineering of porcine endothelial cell lines for evaluation of human-to-pig xenoreactive immune responses. Sci Rep. 2021;11(1):13131.                                                                     | 2021 | Xenotransplantation | Binding of human serum antibodies to GGTA1/CMAH/β4galNT2/SLA-I α chain/B2M KO porcine liver-derived cells | 20     | Serum                          | NOT STATED  | Flow Cytometry | Natural   | GGTA1/CMAH/B4GalNT2 KO porcine liver-derived cells | WT porcine liver-derived cells | FALSE | NOT STATED | NOT STATED | IgG, IgM | 13000 (MFI decrease) | NOT STATED | 14000 (MFI decrease) | NOT STATED | 0.777 |



|                                                                                                                                                                                                                                               |      |                     |                                                                                                                                                       |         |                          |               |                |         |                 |                       |       |                  |                    |          |                    |            |                     |            |            |
|-----------------------------------------------------------------------------------------------------------------------------------------------------------------------------------------------------------------------------------------------|------|---------------------|-------------------------------------------------------------------------------------------------------------------------------------------------------|---------|--------------------------|---------------|----------------|---------|-----------------|-----------------------|-------|------------------|--------------------|----------|--------------------|------------|---------------------|------------|------------|
| Li T, Feng H, Du JX, Xia QB, Cooper DKC, Jiang HT, et al. Serum Antibody Binding and Cytotoxicity to Pig Cells in Chinese Subjects: Relevance to Clinical Renal Xenotransplantation. FRONTIERS IN IMMUNOLOGY. 2022;13.                        | 2022 | Xenotransplantation | Binding of serum antibodies from Chinese renal failure patients to CMAH KO porcine PBMCs                                                              | 20      | Serum, all blood groups  | Asia          | Flow Cytometry | Natural | porcine PBMCs   | CMAH KO porcine PBMCs | TRUE  | NOT STATED       | 85 (IgG), 75 (IgM) | IgG, IgM | 57 (rMFI decrease) | NOT STATED | 134 (rMFI decrease) | NOT STATED | 8.772      |
| Li Y, Fung J, Lin F. Local Inhibition of Complement Improves Mesenchymal Stem Cell Viability and Function After Administration. MOLECULAR THERAPY. 2016;24(9):1665-74.                                                                        | 2016 | Biotherapeutics     | Binding of human anti-Neu5Gc antibodies to Neu5Gc incorporated onto mesenchymal stem cells. Anti-Neu5Gc response as a potential mediator of MSC death | Pool ed | Serum, pooled, CompTecth | North America | Flow Cytometry | Natural | MSCs fed Neu5Ac | MSCs not fed Neu5Ac   | FALSE | NOT STATED       | NOT STATED         | IgG, IgM | Present (weak)     | NOT STATED | Present (strong)    | NOT STATED | NOT STATED |
| Livingston PO, Ritter G, Srivastava P, Padavan M, Calves MJ, Oettgen HF, Old LJ. Characterization of IgG and IgM antibodies induced in melanoma patients by immunization with purified GM2 ganglioside. Cancer Res. 1989;49(24 Pt 1):7045-50. | 1989 | Cancer              | Antibodies against Neu5Gc-GM2 in melanoma patients immunized with GM2 + BCG adjuvant                                                                  | 24      | Serum                    | North America | Dot Blot       | Natural | Neu5Gc-GM2      | Neu5Ac-GM2            | TRUE  | BSA + Goat Serum | 62.5               | IgG, IgM | 2+                 | NOT STATED | NOT STATED          | NOT STATED | 1.5        |

|                                                                                                                                                                                                                                                                                                                   |      |                     |                                                                                                                                              |         |                                  |               |                |           |                                                  |                                                         |       |                       |                     |          |                     |            |                      |            |       |
|-------------------------------------------------------------------------------------------------------------------------------------------------------------------------------------------------------------------------------------------------------------------------------------------------------------------|------|---------------------|----------------------------------------------------------------------------------------------------------------------------------------------|---------|----------------------------------|---------------|----------------|-----------|--------------------------------------------------|---------------------------------------------------------|-------|-----------------------|---------------------|----------|---------------------|------------|----------------------|------------|-------|
| Lu Q, Padler-Karavani V, Yu H, Chen X, Wu SL, Varki A, Hancock WS. LC-MS analysis of polyclonal human anti-Neu5Gc xeno-autoantibodies immunoglobulin G Subclass and partial sequence using multistep intravenous immunoglobulin affinity purification and multienzymatic digestion. Anal Chem. 2012;84(6):2761-8. | 2012 | Healthy Population  | Screening IVIG preparations for anti-Neu5Gc antibodies                                                                                       | Pool ed | IVIG, 4 different preparations   | NOT STATED    | Glycan Array   | Synthetic | Matched Sialoglycan Pairs                        | Matched sialoglycan pairs                               | TRUE  | OVA                   | 100                 | IgG      | 1700 (RFU)          | NOT STATED | NOT STATED           | NOT STATED | 1.882 |
| Lutz AJ, Li P, Estrada JL, Sidner RA, Chihara RK, Downey SM, et al. Double knockout pigs deficient in N-glycolylneuraminic acid and galactose $\alpha$ -1,3-galactose reduce the humoral barrier to xenotransplantation. Xenotransplantation. 2013;20(1):27-35.                                                   | 2013 | Xenotransplantation | Human serum antibody binding to CMAH KO porcine PBMCs and RBCs                                                                               | 10      | Serum, heat inactivated          | North America | Flow Cytometry | Natural   | PBMCs                                            | CMAH KO PBMCs                                           | TRUE  | Sialix Blocking Agent | 90 (IgM), 100 (IgG) | IgG, IgM | 1592 (MFI decrease) | NOT STATED | 10648 (MFI decrease) | NOT STATED | 11.68 |
| Martin MJ, Muotri A, Gage F, Varki A. Human embryonic stem cells express an immunogenic nonhuman sialic acid. nat Med. 2005;11(2):228-32.                                                                                                                                                                         | 2005 | Biotherapeutics     | Neu5Gc incorporated into Human Embryonic stem cells (HESCs) from culture medium. Ability of anti-Neu5Gc antibodies in serum to bind to HESCs | 2       | Serum, 1 high titre, 1 low titre | North America | Flow Cytometry | Natural   | Human embryonic stem cells grown in normal media | Human embryonic stem cells grown in HS-containing media | FALSE | NOT STATED            | NOT STATED          | IgG      | 500 (MFI)           | NOT STATED | NOT STATED           | NOT STATED | 0.1   |

|                                                                                                                                                                                                                                                                           |      |                     |                                                                                                            |         |               |               |                       |           |                               |                                                                                         |       |            |            |          |                   |            |                  |            |            |
|---------------------------------------------------------------------------------------------------------------------------------------------------------------------------------------------------------------------------------------------------------------------------|------|---------------------|------------------------------------------------------------------------------------------------------------|---------|---------------|---------------|-----------------------|-----------|-------------------------------|-----------------------------------------------------------------------------------------|-------|------------|------------|----------|-------------------|------------|------------------|------------|------------|
| Martin PT, Kawanishi K, Ashbrook A, Golden B, Samraj A, Crowe KE, et al. Serum Antibodies to N-Glycolylneuraminic Acid Are Elevated in Duchenne Muscular Dystrophy and Correlate with Increased Disease Pathology in Cmah(-/-)mdx Mice. Am J Pathol. 2021;191(8):1474-86. | 2021 | Inflammation        | Anti-Neu5Gc antibodies in patients with Duchenne Muscular dystrophy                                        | 22      | Serum         | North America | Glycan Array          | Synthetic | Matched Sialoglycan Pairs     | Matched sialoglycan pairs                                                               | TRUE  | OVA        | 100        | IgG      | 6.4               | NOT STATED | NOT STATED       | 0.0625     | NOT STATED |
| Milgrom F, Loza U, Czechowski D, Kasukawa R, Anthone R, Anthone S. "Heterophile" antigen in sera of human recipients of renal allografts. Proc Soc Exp Biol Med. 1996;213(1):80-4.                                                                                        | 1996 | Inflammation        | HD antibodies in patients following kidney transplantation                                                 | 20      | Serum         | NOT STATED    | Double Diffusion test | Natural   | bovine erythrocytes           | Bovine erythrocytes + Homogenized guinea pig kidney (to remove other 'heterophile' Abs) | FALSE | NONE       | 30         | IgM      | NOT STATED        | NOT STATED | NOT STATED       | NOT STATED | NOT STATED |
| Miwa Y, Kobayashi T, nagasaka T, Liu D, Yu M, Yokoyama I, et al. Are N-glycolylneuraminic acid (Hanganutziu-Deicher) antigens important in pig-to-human xenotransplantation? Xenotransplantation. 2004;11(3):247-53.                                                      | 2004 | Xenotransplantation | Antibodies in pooled human serum binding to porcine RBCs and AECs before and after neuraminidase treatment | Pool ed | Serum, pooled | NOT STATED    | Flow Cytometry        | Natural   | porcine RBCs and porcine AECs | Galactosidase and Neuraminidase-treated RBCs and AECs                                   | FALSE | NOT STATED | NOT STATED | IgG, IgM | 64 (MFI decrease) | NOT STATED | 0 (MFI decrease) | NOT STATED | NOT STATED |

|                                                                                                                                                                                                                                                  |      |              |                                                                                                  |    |                                                      |               |                                               |         |                                                       |                         |       |            |                                                |                   |               |            |            |            |            |
|--------------------------------------------------------------------------------------------------------------------------------------------------------------------------------------------------------------------------------------------------|------|--------------|--------------------------------------------------------------------------------------------------|----|------------------------------------------------------|---------------|-----------------------------------------------|---------|-------------------------------------------------------|-------------------------|-------|------------|------------------------------------------------|-------------------|---------------|------------|------------|------------|------------|
| Moore TL, Dörner RW. 19S IgM Forssman-type heterophile antibodies in juvenile rheumatoid arthritis. Arthritis Rheum. 1980;23(11):1262-7.                                                                                                         | 1980 | Inflammation | HD antibodies in serum from children with juvenile rheumatoid arthritis                          | 54 | Serum, removed after 30 min clotting. Stored at -20C | North America | Hemolytic assay (measured hemoglobin release) | Natural | bovine erythrocytes                                   | Guinea pig kidney cells | FALSE | NOT STATED | 7                                              | IgG, IgM          | 1 in 80       | NOT STATED | 1 in 1120  | NOT STATED | 8          |
| Morito T, Kano K, Milgrom F. Hanganutziu-Deicher antibodies in infectious mononucleosis and other diseases. J Immunol. 1982;129(6):2524-8.                                                                                                       | 1982 | Infection    | HD antibodies in serum from infectious mononucleosis patients and patients with other conditions | 41 | Serum, heat inactivated, stored at -20C              | Asia          | ELISA                                         | Natural | High molecular weight bovine erythrocyte glycoprotein | NOT STATED              | FALSE | BSA        | 56.1 (IM), 22 (RA), 13.3 (cancer), 5 (healthy) | IgG, IgM (pooled) | 0.552 (OD)    | NOT STATED | NOT STATED | 0.44       | NOT STATED |
| Mukuria CJ, Noguchi A, Suzuki E, Naiki M. POTENTIAL USE OF SPECIFIC HUMAN AND CHICKEN ANTIBODIES FOR DETECTION OF HANGANUTZIU-DEICHER ANTIGEN(S) IN SERA OF CANCER-PATIENTS. JAPANESE JOURNAL OF MEDICAL SCIENCE & BIOLOGY. 1994;47(5-6):253-64. | 1994 | Cancer       | HD antibodies in serum from various cancer patients                                              | 8  | Serum                                                | Asia          | Radioimmunoassay                              | Natural | radiolabeled bovine glycoprotein                      | NOT STATED              | FALSE | NOT STATED | 37.5                                           | IgG               | 27.7% (titre) | NOT STATED | NOT STATED | NOT STATED | 0.866      |

|                                                                                                                                                                                                                                                 |      |                    |                                                                                                                                                                                       |    |                       |      |                  |         |                                   |                              |       |            |                     |          |                           |            |                    |            |       |
|-------------------------------------------------------------------------------------------------------------------------------------------------------------------------------------------------------------------------------------------------|------|--------------------|---------------------------------------------------------------------------------------------------------------------------------------------------------------------------------------|----|-----------------------|------|------------------|---------|-----------------------------------|------------------------------|-------|------------|---------------------|----------|---------------------------|------------|--------------------|------------|-------|
| Mukuria JC, naiki M, Hashimoto M, Kato S. A specific enzyme-linked immunosorbent assay (ELISA) procedure for detection of heterophile Hanganutziu and Deicher (HD) antibodies. J Immunol Methods. 1986;86(2):179-85.                            | 1986 | Healthy Population | HD antibodies in serum from healthy individuals and patients hospitalized for a range of conditions                                                                                   | 54 | Serum, stored at -80C | Asia | ELISA            | Natural | Neu5Gc-GM3                        | Uncoated wells               | FALSE | OVA        | 5.7                 | IgG      | 35 (relative ELISA value) | NOT STATED | NOT STATED         | NOT STATED | 5.71  |
| Mukuria JC, naiki M, Hashimoto M, Nishiura K, Okabe M, Kato S. A potential radioimmunoassay system for detection of Hanganutziu-Deicher type heterophile antigen(s) and antibodies in tissues and fluids. J Immunol Methods. 1985;80(1):97-106. | 1985 | Cancer             | Developing a radioimmunoassay for HD antibodies in serum from cancer patients. Antibody binding causes radiolabelled bovine erythrocyte major protein to precipitate out of solution. | 8  | Serum, stored at -80C | Asia | Radioimmunoassay | Natural | radiolabelled bovine glycoprotein | NOT STATED                   | FALSE | OVA        | 37.5                | IgG      | 27.6 (binding %)          | NOT STATED | NOT STATED         | NOT STATED | 0.87  |
| Mukuria JC, naiki M, Kato S. Microstructure of the sialic acid moiety of N-glycolylneuraminylactosylceramide and the elucidation of Hanganutziu and Deicher (HD) antigenicity. Immunology Letters. 1986;12(2-3):165-9.                          | 1985 | Cancer             | Assessing the immunogenicity of the HD antigen. Identification of Neu5Gc as the main 'immunogenic' component. Used serum from cancer patients.                                        | 4  | Serum                 | Asia | ELISA            | Natural | Neu5Gc-GM3                        | sialidase-treated Neu5Gc-GM3 | FALSE | NOT STATED | 100 (IgG), 75 (IgM) | IgG, IgM | 2800 (max dilution)       | NOT STATED | 425 (max dilution) | NOT STATED | 1.371 |

|                                                                                                                                                                                                                      |      |              |                                                                                                                                       |     |                                                                    |               |                                                     |           |                     |                    |       |      |     |               |            |            |            |            |            |
|----------------------------------------------------------------------------------------------------------------------------------------------------------------------------------------------------------------------|------|--------------|---------------------------------------------------------------------------------------------------------------------------------------|-----|--------------------------------------------------------------------|---------------|-----------------------------------------------------|-----------|---------------------|--------------------|-------|------|-----|---------------|------------|------------|------------|------------|------------|
| Nguyen DH, Tangvoranuntakul P, Varki A. Effects of natural human antibodies against a nonhuman sialic acid that metabolically incorporates into activated and malignant immune cells. J Immunol. 2005;175(1):228-36. | 2005 | Cancer       | Incorporation of Neu5Gc into primary leukemia cells in culture.                                                                       | 21  | Serum                                                              | North America | ELISA                                               | Synthetic | Neu5Gc-PAA          | Neu5Ac-PAA         | TRUE  | TBST | 100 | IgG, IGM, IgA | 0.54       | 0.19       | 0.38       | NOT STATED | 11.59      |
| Nishimaki T, Kano K, Milgrom F. Hanganutziu-Deicher antigen and antibody in pathologic sera and tissues. J Immunol. 1979;122(6):2314-8.                                                                              | 1979 | Cancer       | Using HD antibodies to also identify HD antigen in patients with various cancers and inflammatory conditions                          | 118 | Serum, heat inactivated, stored at -20C                            | North America | Hemolytic assay                                     | Natural   | Neu5Gc-GM3          | NOT STATED         | FALSE | NONE | 15  | Total         | NOT STATED | NOT STATED | NOT STATED | NOT STATED | NOT STATED |
| Nishimaki T, Kano K, Milgrom F. Studies on heterophile antibodies in rheumatoid arthritis. Arthritis Rheum. 1978;21(6):634-8.                                                                                        | 1978 | Inflammation | Antibodies against sheep and bovine erythrocytes in Rheumatoid arthritis patients linked back to 'heterophile' HD antibodies in serum | 10  | Serum, heat inactivated                                            | North America | Hemolytic assay (measured inhibition by HD antigen) | Natural   | bovine erythrocytes | Human erythrocytes | FALSE | NONE | 60  | Total         | NOT STATED | NOT STATED | NOT STATED | NOT STATED | NOT STATED |
| Nishimaki T, Kano K, Milgrom F. Studies on immune complexes in rheumatoid arthritis. Arthritis Rheum. 1978;21(6):639-44.                                                                                             | 1978 | Inflammation | Immune complexes formed in culture, triggered by HD-antigen and serum from patients with rheumatoid arthritis                         | 15  | Serum, off the clot after 30 min centrifugation. Heat inactivated. | North America | Anti-antibody inhibition test                       | Natural   | Neu5Gc-GM3          | NOT STATED         | FALSE | NONE | 47  | IgG, IgM      | NOT STATED | NOT STATED | NOT STATED | NOT STATED | NOT STATED |

|                                                                                                                                                                                                                                      |      |                 |                                                                                                                               |      |       |               |                  |         |                                  |                                               |       |            |      |       |                        |            |            |            |            |
|--------------------------------------------------------------------------------------------------------------------------------------------------------------------------------------------------------------------------------------|------|-----------------|-------------------------------------------------------------------------------------------------------------------------------|------|-------|---------------|------------------|---------|----------------------------------|-----------------------------------------------|-------|------------|------|-------|------------------------|------------|------------|------------|------------|
| Noguchi A, Mukuria CJ, Suzuki E, naiki M. Immunogenicity of N-glycolylneuraminic acid-containing carbohydrate chains of recombinant human erythropoietin expressed in Chinese hamster ovary cells. J Biochem. 1995;117(1):59-62.     | 1995 | Biotherapeutics | Neu5Gc in recombinant human erythropoietin produced by CHO cells. Antigenicity of rhEPO in human serum compared to Neu5Gc-GM3 | 1    | Serum | Asia          | ELISA            | Natural | rhEPO and Neu5Gc-GM3             | Uncoated wells                                | FALSE | OVA        | 100  | IgG   | 10% inhibition (rhEPO) | NOT STATED | NOT STATED | NOT STATED | NOT STATED |
| Noguchi A, naiki M, Mukuria CJ. Potential Use of Specific Human and Chicken Antibodies for Detection of Hanganutziu-Deicher Antigen (S) in Sera of Cancer Patients. Japanese Journal of Medical Science and Biology. 1994;47:253-64. | 1994 | Cancer          | Comparing chicken anti-Neu5Gc-GM3 with human anti-Neu5Gc-GM3 from cancer patients                                             | 8    | Serum | Asia          | Radioimmunoassay | Natural | radiolabeled bovine glycoprotein | radiolabeled bovine glycoprotein pre-absorbed | FALSE | OVA        | 37.5 | IgG   | 27.6 (binding %)       | NOT STATED | NOT STATED | NOT STATED | 0.87       |
| Nowak JA, Jain NK, Stinson MW, Merrick JM. Interaction of bovine erythrocyte N-glycolylneuraminic acid-containing gangliosides and glycoproteins with a human Hanganutziu-Deicher serum. Mol Immunol. 1986;23(7):693-700.            | 1986 | Inflammation    | Isolating HD antibodies from human serum collected from various hospital patients                                             | 1000 | Serum | North America | Hemagglutination | Natural | bovine erythrocytes              | NOT STATED                                    | FALSE | NOT STATED | 0.1  | Total | NOT STATED             | NOT STATED | NOT STATED | NOT STATED | NOT STATED |

|                                                                                                                                                                                                                                               |      |                    |                                                                                                                                                           |     |       |               |       |           |                     |                     |       |            |     |          |                  |            |                |            |       |
|-----------------------------------------------------------------------------------------------------------------------------------------------------------------------------------------------------------------------------------------------|------|--------------------|-----------------------------------------------------------------------------------------------------------------------------------------------------------|-----|-------|---------------|-------|-----------|---------------------|---------------------|-------|------------|-----|----------|------------------|------------|----------------|------------|-------|
| Oaks M, Michel K, Downey FX, Thohan V. Xenoreactive antibodies and latent fibrin formation in VAD and cardiac transplant recipients can confound the detection and measurement of anti-AT1R antibodies. Am J Transplant. 2018;18(11):2763-71. | 2018 | Biotherapeutics    | Anti-Neu5Gc antibodies as a potential source of interference with anti-ATR1 antibody tests used to assess risk of graft rejection in transplant patients. | 294 | Serum | North America | ELISA | Synthetic | Biotinylated Neu5Gc | Biotinylated Neu5Ac | TRUE  | PBST       | 100 | IgG      | 3.48             | NOT STATED | NOT STATED     | NOT STATED | 4.8   |
| Obukhova P, Tsygankova S, Chinarev A, Shilova N, Nokel A, Kosma P, Bovin N. Are there specific antibodies against Neu5Gc epitopes in the blood of healthy individuals? Glycobiology. 2020;30(6):395-406.                                      | 2020 | Healthy Population | Attempting to re-assess the prevalence of anti-Neu5Gc antibodies in the general population                                                                | 20  | Serum | Europe        | ELISA | Synthetic | Neu5Gc-glycan-PAA   | PAA only            | FALSE | BSA        | 25  | Total    | 13.8 (RF U %)    | NOT STATED | NOT STATED     | NOT STATED | 0.87  |
| Odaka M, Yuki N, Nobile-Orazio E, Carpo M, Hirata K. Antibodies to GM1(NeuGc) in Guillain-Barré syndrome after ganglioside therapy. J Neurol Sci. 2000;175(2):96-106.                                                                         | 2000 | Inflammation       | Anti-Neu5Gc antibodies in Guillain-Barre patients previously treated with bovine brain ganglioside injection                                              | 161 | Serum | Europe        | ELISA | Natural   | Neu5Gc-GM1          | Neu5Ac-GM1          | TRUE  | NOT STATED | 14  | IgG, IgM | 30833 (dilution) | NOT STATED | 875 (dilution) | NOT STATED | 4.135 |



|                                                                                                                                                                                                                                                                     |      |                     |                                                                                                                                                                        |        |                            |            |                |           |                                                |                |       |            |            |          |                        |            |                        |            |            |
|---------------------------------------------------------------------------------------------------------------------------------------------------------------------------------------------------------------------------------------------------------------------|------|---------------------|------------------------------------------------------------------------------------------------------------------------------------------------------------------------|--------|----------------------------|------------|----------------|-----------|------------------------------------------------|----------------|-------|------------|------------|----------|------------------------|------------|------------------------|------------|------------|
| Odaka M, Yuki N, Yoshino H, Kasama T, Handa S, Irie F, et al. N-glycolylneuraminic acid-containing GM1 is a new molecule for serum antibody in Guillain-Barré syndrome. <i>Ann Neurol.</i> 1998;43(6):829-34.                                                       | 2004 | Inflammation        | Anti-Neu5Gc-GM1 antibodies in Guillain-Barre syndrome patients previously injected with bovine brain gangliosides                                                      | 20     | Serum                      | Asia       | ELISA          | Natural   | Neu5Gc-GM1                                     | Neu5Ac-GM1     | TRUE  | NOT STATED | 10         | IgG, IgM | 8000 (median dilution) | NOT STATED | 4000 (median dilution) | NOT STATED | 64         |
| Okamura RM, Lebkowski J, Au M, Priest CA, Denham J, Majumdar AS. Immunological properties of human embryonic stem cell-derived oligodendrocyte progenitor cells. <i>J Neuroimmunol.</i> 2007;192(1-2):134-44.                                                       | 2007 | Biotherapeutics     | Concerns about anti-Neu5Gc antibodies as a cause of rejection in human embryonic stem cell derived oligodendrocyte progenitor cell transplant after spinal cord injury | 4      | Serum, heat inactivated    | NOT STATED | ELISA          | Synthetic | Neu5Gc-PAA                                     | Neu5Ac-PAA     | TRUE  | TBST       | 75         | IgG      | 262.5                  | NOT STATED | NOT STATED             | NOT STATED | 3.81       |
| Omori T, Nishida T, Komoda H, Fumimoto Y, Ito T, Sawa Y, et al. A study of the xenoantigenicity of neonatal porcine islet-like cell clusters (NPCC) and the efficiency of adenovirus-mediated DAF (CD55) expression. <i>Xenotransplantation.</i> 2006;13(5):455-64. | 2006 | Xenotransplantation | Reactivity of human serum antibodies to HD antigens on neonatal porcine islet-like cell clusters used for transplantation in T1 diabetes patients                      | Pooled | Pooled Serum, blood type O | NOT STATED | Flow Cytometry | Natural   | Neuraminidase-treated porcine islet-like cells | Secondary only | FALSE | NOT STATED | NOT STATED | IgG, IgM | 307.7 (shift)          | NOT STATED | minus 8.3 (shift)      | NOT STATED | NOT STATED |

|                                                                                                                                                                                                                                              |      |                    |                                                                                                                                                                                           |     |                                     |               |              |           |                              |                                   |      |     |            |               |              |              |              |       |            |
|----------------------------------------------------------------------------------------------------------------------------------------------------------------------------------------------------------------------------------------------|------|--------------------|-------------------------------------------------------------------------------------------------------------------------------------------------------------------------------------------|-----|-------------------------------------|---------------|--------------|-----------|------------------------------|-----------------------------------|------|-----|------------|---------------|--------------|--------------|--------------|-------|------------|
| Padler-Karavani V, Hurtado-Ziola N, Pu M, Yu H, Huang S, Muthana S, et al. Human xeno-autoantibodies against a non-human sialic acid serve as novel serum biomarkers and immunotherapeutics in cancer. Cancer Res. 2011;71(9):3352-63.       | 2011 | Cancer             | Affinity purification of anti-Neu5Gc antibodies from pooled human serum as a potential immunotherapeutic strategy. Also assessed repertoire of anti-Neu5Gc antibodies in cancer patients. | 386 | Serum                               | North America | Glycan Array | Synthetic | Matched Sialoglycan Pairs    | Matched sialoglycan pairs         | TRUE | OVA | NOT STATED | IgG           | 5000 (RFU)   | NOT STATED   | NOT STATED   | 1.46  |            |
| Padler-Karavani V, Tremoulet AH, Yu H, Chen X, Burns JC, Varki A. A simple method for assessment of human anti-Neu5Gc antibodies applied to Kawasaki disease. PLoS One. 2013;8(3):e58443.                                                    | 2013 | Inflammation       | Assessment of anti-Neu5Gc antibodies in children with Kawasaki disease (pediatric inflammatory heart condition)                                                                           | 10  | Serum, off the clot. Stored at -80C | North America | ELISA        | Natural   | WT Mouse Sialoglyco proteins | CMAH KO mouse Sialoglyco proteins | TRUE | OVA | 100        | IgG, IgA      | 2.7 (ug/mL)  | 0.5 (ug/mL)  | NOT STATED   | 0.148 | NOT STATED |
| Padler-Karavani V, Yu H, Cao H, Chokhawala H, Karp F, Varki N, et al. Diversity in specificity, abundance, and composition of anti-Neu5Gc antibodies in normal humans: potential implications for disease. Glycobiology. 2008;18(10):818-30. | 2008 | Healthy Population | Assessing the repertoire of anti-Neu5Gc antibodies in the 'normal' human population.                                                                                                      | 16  | Serum, stored at -80C               | North America | ELISA        | Synthetic | Neu5Gc-PAA-Biotin            | Neu5Ac-PAA-Biotin                 | TRUE | OVA | 100        | IgG, IgA, IgM | 3.48 (ug/mL) | 1.48 (ug/mL) | 0.24 (ug/mL) | 0.23  | NOT STATED |

|                                                                                                                                                                                                                                |      |                    |                                                                                                     |         |                                             |               |                |           |                                                           |                                                           |       |                         |            |          |                      |             |                      |            |            |
|--------------------------------------------------------------------------------------------------------------------------------------------------------------------------------------------------------------------------------|------|--------------------|-----------------------------------------------------------------------------------------------------|---------|---------------------------------------------|---------------|----------------|-----------|-----------------------------------------------------------|-----------------------------------------------------------|-------|-------------------------|------------|----------|----------------------|-------------|----------------------|------------|------------|
| Pazynina GV, Tsygankova SV, Ryzhov IM, Shilova NV, Polyakova SM, Paramonov AS, et al. Synthesis of GalNGca1-3Galnacα disaccharide and its interaction with human blood antibodies. MENDELEEV COMMUNICATIONS. 2019;29(3):254-5. | 2019 | Healthy Population | Serum antibody binding to a Neu5Gc-containing version of the mucin core 5 motif (GalNGca1-3Galnacα) | Pool ed | IVIG, 1 preparati on                        | NOT STATED    | Glycan Array   | Synthetic | GalNGca1 - 3Galnacα-sp                                    | Galnacα1-3Galnacα-sp                                      | TRUE  | PBST                    | NOT STATED | IgG      | 3010 (AU)            | NO T STATED | NO T STATED          | 0.095      | NOT STATED |
| Pham T, Gregg CJ, Karp F, Chow R, Padler-Karavani V, Cao H, et al. Evidence for a novel human-specific xeno-auto-antibody response against vascular endothelium. Blood. 2009;114(25):5225-35.                                  | 2009 | Inflammation       | Potential role of anti-Neu5Gc antibodies in endothelial activation                                  | 14      | Serum, stored at -80C, not heat inactivated | North America | Flow Cytometry | Natural   | Human umbilical vein endothelial cells loaded with Neu5Gc | Human umbilical vein endothelial cells loaded with Neu5Ac | TRUE  | NOT STATED              | 57         | IgG, IgM | 14.3 (% of standard) | NO T STATED | 30.4 (% of standard) | NOT STATED | 7.69       |
| Ramm R, Hartmann T, Tudorache I, Haverich A, Hilfiker A. No evidence for αGal epitope transfer from media containing FCS onto human endothelial cells in culture. Xenotransplantation. 2015;22(5):345-55.                      | 2015 | Biotherapeutics    | incorporation of xenogenic epitopes from FCS in media onto human endothelial cells                  | 14      | Serum, heat inactivated, stored at -80C     | Europe        | ELISA          | Synthetic | Neu5Gc-PAA                                                | PAA only                                                  | FALSE | Polyethylene Glycol 600 | 50         | Total    | 500 (AU)             | NO T STATED | NO T STATED          | NOT STATED | 6          |

|                                                                                                                                                                                                                                                                           |      |                     |                                                                                                                                                                                |         |                                         |               |              |           |                              |                                   |      |     |            |       |             |            |            |            |       |
|---------------------------------------------------------------------------------------------------------------------------------------------------------------------------------------------------------------------------------------------------------------------------|------|---------------------|--------------------------------------------------------------------------------------------------------------------------------------------------------------------------------|---------|-----------------------------------------|---------------|--------------|-----------|------------------------------|-----------------------------------|------|-----|------------|-------|-------------|------------|------------|------------|-------|
| Reuven EM, Leviatan Ben-Arye S, Marshanski T, Breimer ME, Yu H, Fellah-Hebia I, et al. Characterization of immunogenic Neu5Gc in bioprosthetic heart valves. Xenotransplantation. 2016;23(5):381-92.                                                                      | 2016 | Xenotransplantation | Reactivity of human anti-Neu5Gc antibodies with Neu5Gc on bioprosthetic heart valves                                                                                           | Pool ed | IVIG, 1 preparation                     | NOT STATED    | Glycan Array | Synthetic | Matched Sialoglycan Pairs    | Matched sialoglycan pairs         | TRUE | OVA | NOT STATED | IgG   | 20779 (RFU) | NOT STATED | NOT STATED | NOT STATED | 1.148 |
| Rodríguez-Zhurbenko N, Martínez D, Blanco R, Rondón T, Griñán T, Hernández AM. Human antibodies reactive to NeuGcGM3 ganglioside have cytotoxic antitumor properties. EUROPEAN JOURNAL OF IMMUNOLOGY. 2013;43(3):826-37.                                                  | 2013 | Cancer              | Assessing anti-Neu5Gc-GM3 in serum from healthy donors and NSCLC patients, as well as the ability of these antibodies to trigger CDC against murine leukaemia cells in culture | 100     | Serum, heat inactivated, stored at -20C | North America | ELISA        | Natural   | Neu5Gc-GM3                   | Neu5Ac-GM3                        | TRUE | HSA | 65         | IgG+M | 0.1 (OD)    | NOT STATED | NOT STATED | NOT STATED | 4     |
| Rousse J, Salama A, Leviatan Ben-Arye S, Hrubá P, Slatinska J, Evanno G, et al. Quantitative and qualitative changes in anti-Neu5Gc antibody response following rabbit anti-thymocyte IgG induction in kidney allograft recipients. Eur J Clin Invest. 2019;49(4):e13069. | 2019 | Biotherapeutics     | Anti-Neu5Gc antibodies in kidney transplant patients treated with rabbit anti-thymocyte globulin (ATG) as an immunosuppressant                                                 | 60      | Serum                                   | Europe        | ELISA        | Natural   | WT Mouse Sialoglyco proteins | CMAH KO mouse Sialoglyco proteins | TRUE | OVA | 100        | IgG   | 1.0 (ug/mL) | NOT STATED | NOT STATED | NOT STATED | 2.7   |

|                                                                                                                                                                                                                                             |      |                     |                                                                                                                                                          |    |                       |               |              |           |                              |                                   |       |     |     |          |                    |            |                    |            |       |
|---------------------------------------------------------------------------------------------------------------------------------------------------------------------------------------------------------------------------------------------|------|---------------------|----------------------------------------------------------------------------------------------------------------------------------------------------------|----|-----------------------|---------------|--------------|-----------|------------------------------|-----------------------------------|-------|-----|-----|----------|--------------------|------------|--------------------|------------|-------|
| Sæthre M, Baumann BC, Fung M, Seebach JD, Mollnes TE. Characterization of natural human anti-non-Gal antibodies and their effect on activation of porcine gal-deficient endothelial cells. TRANSPLANTATION. 2007;84(2):244-50.              | 2007 | Xenotransplantation | HD antigen as a potential target for 'non-gal' xenoreactive antibodies to porcine endothelial cells                                                      | 19 | Serum                 | Europe        | ELISA        | Synthetic | Neu5Gc-PAA                   | Neu5Ac-PAA                        | TRUE  | BSA | 100 | IgG, IgM | 70 (% of standard) | NOT STATED | 90 (% of standard) | NOT STATED | 7.714 |
| Saha S, Coady A, Sasmal A, Kawanishi K, Choudhury B, Yu H, et al. Exploring the Impact of Ketodeoxynonulosonic Acid in Host-Pathogen Interactions Using Uptake and Surface Display by Nontypeable Haemophilus influenzae. mBio. 2021;12(1). | 2021 | Infection           | Anti-Sia antibody responses mounted in humans following exposure to Sias on bacteria. Main focus on Ketodeoxynonulosonic acid, but also looked at Neu5Gc | 24 | Serum                 | North America | Glycan Array | Synthetic | Neu5Gc-containing glycans    | NONE                              | FALSE | OVA | 100 | IgG, IgM | 320 (RFU)          | NOT STATED | 50 (RFU)           | NOT STATED | 2.5   |
| Salama A, Evanno G, Lim N, Rousse J, Le Berre L, Nicot A, et al. Anti-Gal and Anti-Neu5Gc Responses in Nonimmunosuppressed Patients After Treatment With Rabbit Antithymocyte Polyclonal IgGs. Transplantation. 2017;101(10):2501-7.        | 2017 | Biotherapeutics     | Anti-Neu5Gc antibodies in type 1 diabetes patients treated with rabbit anti-thymocyte globulin (ATG)                                                     | 58 | Serum, stored at -80C | North America | ELISA        | Natural   | WT Mouse Sialoglyco proteins | CMAH KO mouse Sialoglyco proteins | TRUE  | OVA | 100 | IgG, IgM | 3.5 (ug/mL)        | NOT STATED | 0.65 (ug/mL)       | NOT STATED | 285.7 |

|                                                                                                                                                                                                                                                                                                                                                         |      |                     |                                                                                                                                                                    |      |                                                                                                       |               |       |         |                              |                                   |       |     |    |          |             |            |             |        |            |
|---------------------------------------------------------------------------------------------------------------------------------------------------------------------------------------------------------------------------------------------------------------------------------------------------------------------------------------------------------|------|---------------------|--------------------------------------------------------------------------------------------------------------------------------------------------------------------|------|-------------------------------------------------------------------------------------------------------|---------------|-------|---------|------------------------------|-----------------------------------|-------|-----|----|----------|-------------|------------|-------------|--------|------------|
| Samraj AN, Bertrand KA, Luben R, Khedri Z, Yu H, Nguyen D, et al. Polyclonal human antibodies against glycans bearing red meat-derived non-human sialic acid N-glycolylneuraminic acid are stable, reproducible, complex and vary between individuals: Total antibody levels are associated with colorectal cancer risk. PLoS One. 2018;13(6):e0197464. | 2018 | Cancer              | Links between anti-Neu5Gc antibody titres and colorectal cancer risk in NHS professionals. Also assessed links between red meat intake and anti-Neu5Gc antibodies. | 1469 | Serum, collected in heparin-treated or EDTA-treated tubes then centrifuged. Stored in liquid nitrogen | North America | ELISA | Natural | WT Mouse Sialoglyco proteins | CMAH KO mouse Sialoglyco proteins | TRUE  | OVA | 90 | IgG      | 1.7 (ug/mL) | NOT STATED | NOT STATED  | 0.941  | NOT STATED |
| Scobie L, Padler-Karavani V, Le Bas-Bernardet S, Crossan C, Blaha J, Matouskova M, et al. Long-Term IgG Response to Porcine Neu5Gc Antigens without Transmission of PERV in Burn Patients Treated with Porcine Skin Xenografts. JOURNAL OF IMMUNOLOGY. 2013;191(6):2907-15.                                                                             | 2013 | Xenotransplantation | Anti-Neu5Gc antibodies in burn patients treated with porcine skin grafts                                                                                           | 10   | Serum                                                                                                 | Europe        | ELISA | Natural | WT Mouse Sialoglyco proteins | NONE                              | FALSE | OVA | 60 | IgG, IgM | 8.0 (ug/mL) | NOT STATED | 1.9 (ug/mL) | 0.1875 | NOT STATED |

|                                                                                                                                                                                                                                                                                     |      |                     |                                                                                                                                                                        |     |       |               |       |         |                              |            |       |     |      |          |                    |            |                    |            |            |
|-------------------------------------------------------------------------------------------------------------------------------------------------------------------------------------------------------------------------------------------------------------------------------------|------|---------------------|------------------------------------------------------------------------------------------------------------------------------------------------------------------------|-----|-------|---------------|-------|---------|------------------------------|------------|-------|-----|------|----------|--------------------|------------|--------------------|------------|------------|
| Segatori VI, Cuello HA, Gulino CA, Albertó M, Venier C, Guthmann MD, et al. Antibody-dependent cell-mediated cytotoxicity induced by active immunotherapy based on racotumomab in non-small cell lung cancer patients. <i>CANCER IMMUNOLOGY IMMUNOTHERAPY</i> . 2018;67(8):1285-96. | 2018 | Cancer              | Anti-Neu5Gc-GM3 antibodies in serum of NSCLC patients immunized with Racotumomab (Anti-idiotypic antibody which aims to trigger an immune response against Neu5Gc-GM3) | 30  | Serum | North America | ELISA | Natural | Neu5Gc-GM3                   | Neu5Ac-GM3 | TRUE  | HSA | 56.6 | IgG, IgM | 130 (% of control) | NOT STATED | 250 (% of control) | NOT STATED | 5.19       |
| Senage T, Paul A, Le Tourneau T, Fellah-Hebia I, Vadori M, Bashir S, et al. The role of antibody responses against glycans in bioprosthetic heart valve calcification and deterioration. <i>nat Med</i> . 2022;28(2):283-94.                                                        | 2022 | Xenotransplantation | Potential role of anti-Neu5Gc antibodies in calcification of bioprosthetic heart valves. Assessed titres pre- and post-transplantation                                 | 497 | Serum | Europe        | ELISA | Natural | WT Mouse Sialoglyco proteins | NONE       | FALSE | OVA | 100  | IgG      | 2.9 (ug/mL)        | NOT STATED | NOT STATED         | 0.069      | NOT STATED |

|                                                                                                                                                                                                                                                                              |      |                     |                                                                                                                 |    |                                                                                           |        |          |           |                                           |                                     |       |                         |      |       |                 |            |            |            |            |
|------------------------------------------------------------------------------------------------------------------------------------------------------------------------------------------------------------------------------------------------------------------------------|------|---------------------|-----------------------------------------------------------------------------------------------------------------|----|-------------------------------------------------------------------------------------------|--------|----------|-----------|-------------------------------------------|-------------------------------------|-------|-------------------------|------|-------|-----------------|------------|------------|------------|------------|
| Smart I, Goecke T, Ramm R, Petersen B, Lenz D, Haverich A, et al. Dot blots of solubilized extracellular matrix allow quantification of human antibodies bound to epitopes present in decellularized porcine pulmonary heart valves. Xenotransplantation. 2021;28(1):e12646. | 2021 | Xenotransplantation | Comparison of dot blot and ELISA methods to measure human serum antibody binding to porcine heart valve tissues | 12 | Serum collected in Serum Monovettes and centrifuged for 2500xg for 20 min. stored at -80C | Europe | Dot blot | Natural   | Solubilised GGTA1 KO porcine heart valves | Solubilised WT porcine heart valves | FALSE | NONE                    | 16   | Total | 100 (AU)        | NOT STATED | NOT STATED | 0.514      | NOT STATED |
| Smart I, Goecke T, Ramm R, Petersen B, Lenz D, Haverich A, et al. Dot blots of solubilized extracellular matrix allow quantification of human antibodies bound to epitopes present in decellularized porcine pulmonary heart valves. Xenotransplantation. 2021;28(1):e12646. | 2021 | Xenotransplantation | Comparison of dot blot and ELISA methods to measure human serum antibody binding to porcine heart valve tissues | 12 | Serum collected in Serum Monovettes and centrifuged for 2500xg for 20 min. stored at -80C | Europe | ELISA    | Synthetic | Neu5Gc-PAA                                | Neu5Ac-PAA                          | TRUE  | Polyethylene Glycol 600 | 66.6 | Total | 2.7 (Log titer) | NOT STATED | NOT STATED | NOT STATED | 2.59       |



|                                                                                                                                                                                                                                                                                                                       |      |                     |                                                                                                                                            |            |                                             |            |                |         |                                   |                                   |       |      |            |          |                 |            |                 |            |            |
|-----------------------------------------------------------------------------------------------------------------------------------------------------------------------------------------------------------------------------------------------------------------------------------------------------------------------|------|---------------------|--------------------------------------------------------------------------------------------------------------------------------------------|------------|---------------------------------------------|------------|----------------|---------|-----------------------------------|-----------------------------------|-------|------|------------|----------|-----------------|------------|-----------------|------------|------------|
| Song KH, Kang YJ, Jin UH, Park YI, Kim SM, Seong HH, et al. Cloning and functional characterization of pig CMP- <i>acetylneuraminic acid hydroxylase</i> for the synthesis of <i>glycolylneuraminic acid</i> as the xenoantigenic determinant in pig-human xenotransplantation. BIOCHEMICAL JOURNAL. 2010;427:179-88. | 2010 | Xenotransplantation | Human serum antibody binding to CMAH transfected pig kidney cells                                                                          | NOT STATED | Serum                                       | NOT STATED | Flow Cytometry | Natural | CMAH-transfected pig kidney cells | mock transfected pig kidney cells | TRUE  | NONE | NOT STATED | IgG, IgM | 10 (mean shift) | NOT STATED | 30 (mean shift) | 0.5        | NOT STATED |
| Tachi Y, Kobayashi T, Yokoyama I, Hayashi S, Negita M, namii Y, et al. Variability of Cytotoxicity to Pig Cultured Cells and Its Determinant Factor in Human Sera. Transplantation Proceedings. 1998;30(1):71-3.                                                                                                      | 1998 | Xenotransplantation | Assessing human serum cytotoxicity to PK15 pig kidney cell line as a potential indicator of graft rejection. Looked at HD antibody titres. | 20         | Serum, stored at -70C, not heat inactivated | Asia       | ELISA          | Natural | Neu5Gc-GM3                        | Uncoated wells                    | FALSE | OVA  | 10         | IgG, IgM | 0.09 (OD)       | NOT STATED | 0.072 (OD)      | NOT STATED | 0.189      |

|                                                                                                                                                                                                                                                                  |      |                    |                                                                                                                                                   |    |                                         |               |                     |           |                                                       |                                         |       |            |                                    |               |                                 |            |            |            |            |
|------------------------------------------------------------------------------------------------------------------------------------------------------------------------------------------------------------------------------------------------------------------|------|--------------------|---------------------------------------------------------------------------------------------------------------------------------------------------|----|-----------------------------------------|---------------|---------------------|-----------|-------------------------------------------------------|-----------------------------------------|-------|------------|------------------------------------|---------------|---------------------------------|------------|------------|------------|------------|
| Tahara H, Ide K, Basnet NB, Tanaka Y, Matsuda H, Takematsu H, et al. Immunological property of antibodies against N-glycolylneuraminic acid epitopes in cytidine monophospho-N-acetylneuraminic acid hydroxylase-deficient mice. J Immunol. 2010;184(6):3269-75. | 2010 | Healthy Population | Investigating anti-Neu5Gc antibodies in CMAH KO mice, but also assessed cytotoxicity of human serum antibodies against WT and CMAH KO mouse cells | 7  | Serum, heat inactivated                 | Asia          | 51 Cr release assay | Natural   | 51 Cr labelled WT mouse thymocytes                    | 50 Cr labelled CMAH KO mouse thymocytes | TRUE  | NOT STATED | NOT STATED                         | Total         | 10 (increase in % cytotoxicity) | NOT STATED | NOT STATED | 0.5        | NOT STATED |
| Takiguchi M, Tamura T, Goto M, Kusakawa S, Milgrom F, Kano K. Immunological studies on Kawasaki disease. I. Appearance of Hanganutziu-Deicher antibodies. Clin Exp Immunol. 1984;56(2):345-52.                                                                   | 1984 | Inflammation       | HD antibodies in serum from patients with Kawasaki disease                                                                                        | 56 | Serum, stored at -20C, heat inactivated | Asia          | ELISA               | Natural   | High molecular weight bovine erythrocyte glycoprotein | NONE                                    | FALSE | PBST       | 43% (IgM), 3% (IgG), 11% (IgA)     | IgG, IgM, IgA | NOT STATED                      | NOT STATED | 0.507 (OD) | NOT STATED | NOT STATED |
| Tangvoranuntakul P, Gagneux P, Diaz S, Bardor M, Varki N, Varki A, Muchmore E. Human uptake and incorporation of an immunogenic nonhuman dietary sialic acid. Proc natl Acad Sci U S A. 2003;100(21):12045-50.                                                   | 2003 | Healthy Population | Investigation of Neu5Gc incorporation into human tissues, including the presence of circulating anti-Neu5Gc antibodies                            | 18 | Serum                                   | North America | ELISA               | Synthetic | Neu5Gc-PAA                                            | Neu5Ac-PAA                              | TRUE  | TBST       | 88.9 (IgA), 77.8 (IgM), 94.4 (IgG) | IgG, IgM, IgA | 0.26 (OD)                       | 0.19 (OD)  | 0.12 (OD)  | NOT STATED | 3.077      |

|                                                                                                                                                                                                                                      |      |                     |                                                                                                                                |    |       |               |       |           |                          |                 |       |      |                    |          |                   |            |               |            |       |
|--------------------------------------------------------------------------------------------------------------------------------------------------------------------------------------------------------------------------------------|------|---------------------|--------------------------------------------------------------------------------------------------------------------------------|----|-------|---------------|-------|-----------|--------------------------|-----------------|-------|------|--------------------|----------|-------------------|------------|---------------|------------|-------|
| Taylor RE, Gregg CJ, Padler-Karavani V, Ghaderi D, Yu H, Huang S, et al. Novel mechanism for the generation of human xeno-autoantibodies against the nonhuman sialic acid N-glycolylneuraminic acid. J Exp Med. 2010;207(8):1637-46. | 2010 | Healthy Population  | Investigating induction of anti-Neu5Gc antibodies in humans, with a specific focus on presentation of Neu5Gc on NTHi bacteria. | 15 | Serum | South America | ELISA | Synthetic | Neu5Gc2-6GalB1-4GlcB-HSA | HSA only        | FALSE | OVA  | 73 (IgM), 93 (IgG) | IgG, IgM | 6.5 (ug/mL)       | NOT STATED | 4 (ug/mL)     | NOT STATED | 2.92  |
| Vanhove B, Duvaux O, Rousse J, Royer PJ, Evanno G, Ciron C, et al. High neutralizing potency of swine glyco-humanized polyclonal antibodies against SARS-CoV-2. European Journal of Immunology. 2021;51(6):1412-22.                  | 2021 | Biotherapeutics     | Potential issues with Neu5Gc-containing glycans on porcine antibodies used to neutralise SARS-CoV-2 infection                  | 59 | Serum | Europe        | ELISA | Natural   | GGTA1 KO pig IgG         | CMAH KO pig IgG | FALSE | OVA  | 22                 | IgG      | 0.6 (OD decrease) | NOT STATED | NOT STATED    | NOT STATED | 2.3   |
| Wang ZY, Burlak C, Estrada JL, Li P, Tector MF, Tector AJ. Erythrocytes from GGTA1/CMAH knockout pigs: implications for xenotransfusion and testing in non-human primates. Xenotransplantation. 2014;21(4):376-84.                   | 2014 | Xenotransplantation | Assessing human serum antibody response to Neu5Gc on porcine erythrocytes (GGTA1 KO and CMAH/GGTA1 KO)                         | 11 | Serum | North America | ELISA | Synthetic | Neu5Gc-PAA               | Neu5Ac-PAA      | TRUE  | TBST | 91                 | IgG, IgM | 0.38 (ug/mL)      | NOT STATED | 0.085 (ug/mL) | NOT STATED | 63.42 |

|                                                                                                                                                                                                                                                              |      |                     |                                                                                              |         |       |               |                                          |           |                           |                             |       |     |            |          |                     |            |                     |            |            |
|--------------------------------------------------------------------------------------------------------------------------------------------------------------------------------------------------------------------------------------------------------------|------|---------------------|----------------------------------------------------------------------------------------------|---------|-------|---------------|------------------------------------------|-----------|---------------------------|-----------------------------|-------|-----|------------|----------|---------------------|------------|---------------------|------------|------------|
| Wang ZY, Li P, Butler JR, Blankenship RL, Downey SM, Montgomery JB, et al. Immunogenicity of renal microvascular endothelial cells from genetically modified pigs. Transplantation. 2016;100(3):533-7.                                                       | 2016 | Xenotransplantation | Human serum antibody binding to GGTA1/CMAH KO porcine renal microvascular endothelial cells. | pool ed | Serum | NOT STATED    | Flow Cytometry                           | Natural   | GGTA1 KO porcine RMECs    | GGTA1/CMAH KO porcine RMECs | FALSE | BSA | NOT STATED | IgG, IgM | 400 00 (MFI change) | NOT STATED | 100 00 (MFI change) | NOT STATED | NOT STATED |
| Yeh P, Ezzelarab M, Bovin N, Hara H, Long C, Tomiyama K, et al. Investigation of potential carbohydrate antigen targets for human and baboon antibodies. Xenotransplantation. 2010;17(3):197-206.                                                            | 2010 | Xenotransplantation | Identifying potential non-gal xenoreactive epitopes on porcine cells, including Neu5Gc       | 16      | Serum | North America | ELISA                                    | Synthetic | Neu5Gc-PAA                | PAA only                    | FALSE | BSA | NOT STATED | IgG, IgM | 0.4 (OD)            | NOT STATED | 0.2 (OD)            | 1          | NOT STATED |
| Yoshino H, Miyatani N, Saito M, Ariga T, Lugaresi A, Latov N, et al. Isolated bovine spinal motoneurons have specific ganglioside antigens recognized by sera from patients with motor neuron disease and motor neuropathy. J Neurochem. 1992;59(5):1684-91. | 1992 | Inflammation        | Anti-Neu5Gc-GM1 antibodies in serum from patients with motoneuron disease                    | 2       | Serum | North America | Thin layer chromatography immunostaining | Natural   | Bovine brain gangliosides | motoneuron gangliosides     | FALSE | BSA | 50         | IgM      | NOT STATED          | NOT STATED | NOT STATED          | NOT STATED | NOT STATED |

|                                                                                                                                                                                                                                        |      |                     |                                                                                                                                            |         |                                                    |               |                  |           |                        |                                  |       |            |            |          |                           |            |                            |            |            |
|----------------------------------------------------------------------------------------------------------------------------------------------------------------------------------------------------------------------------------------|------|---------------------|--------------------------------------------------------------------------------------------------------------------------------------------|---------|----------------------------------------------------|---------------|------------------|-----------|------------------------|----------------------------------|-------|------------|------------|----------|---------------------------|------------|----------------------------|------------|------------|
| Zhang R, Wang Y, Chen L, Wang R, Li C, Li X, et al. Reducing immunoreactivity of porcine bioprosthetic heart valves by genetically-deleting three major glycan antigens, GGTA1/ $\beta$ 4GalNT2 /CMAH. Acta Biomater. 2018;72:196-205. | 2018 | Xenotransplantation | Human serum antibody binding to GGTA1/CMAH/ $\beta$ 4GalNT2 KO porcine heart valve tissue                                                  | Pool ed | Commercial AB serum, heat inactivated              | North America | Flow Cytometry   | Natural   | GGTA1 KO porcine PBMCs | GGTA1/CMAH KO porcine PBMCs      | FALSE | Goat Serum | NOT STATED | IgG, IgM | 3 (relative MFI decrease) | NOT STATED | 10 (Relative MFI decrease) | 0.33       | NOT STATED |
| Zhang Z, Hara H, Long C, Iwase H, Qi H, Macedo C, et al. Immune Responses of HLA Highly Sensitized and Nonsensitized Patients to Genetically Engineered Pig Cells. Transplantation. 2018;102(5):e195-e204                              | 2018 | Xenotransplantation | Binding of serum antibodies from 'immune hypersensitive' renal failure patients to common pig xenoantigens as a predictor of graft failure | 10      | Serum, patients all received previous hemodialysis | North America | ELISA            | Synthetic | Neu5Gc-PAA             | PAA only                         | FALSE | BSA        | 25         | IgG, IgM | 0.08 (OD)                 | NOT STATED | 0.01 (OD)                  | NOT STATED | 0.25       |
| Zhu A, Hurst R. Anti-N-glycolylneuraminic acid antibodies identified in healthy human serum. Xenotransplantation. 2002;9(6):376-81.                                                                                                    | 2002 | Healthy Population  | Assessing anti-Neu5Gc titres in healthy individuals as a source of 'non-Gal' xenoreactive antibodies                                       | 20      | Serum                                              | NOT STATED    | Hemagglutination | Natural   | porcine erythrocytes   | porcine erythrocytes plus Neu5Gc | FALSE | NOT STATED | 85         | IgG      | 50 (average titer)        | NOT STATED | NOT STATED                 | NOT STATED | 0.8        |
